# Supplementary material for: Mapping Quantitative Trait Loci Associated With Resistance to Aflatoxin Accumulation in Maize Inbred Mp719
Source: Front Microbiol. 2020 Feb 4;11:45. doi: 10.3389/fmicb.2020.00045 (PMC7010907; doi:10.3389/fmicb.2020.00045)
Supplement: Supplementary file 2 [file Table_1.xlsx]

## Sheet: Supplemental Table 1
Supplemental Table S1: Linkage map of maize population, Mp719 x Mp725 consisting of 1,276 markers (1,144 Illumina's customized beadchip with 768-Plex and Asta platforms, 103 KASP SNPs by LGC, and 29 SSRs)
No.	Platform	Physical Position (bp)	Chromosome	Genetic Position (cM)	Locus	a	h	b	-	χ2	Signif.†
1	LGC	2934066	1	0	PZA03613_2	49	116	75	3	5.9	*
2	LGC	1961085	1	6.17	PZA01271_1	52	116	73	2	4	-
3	ASTA	679575	1	7.671	PZE-101000349	50	113	77	3	6.89	**
4	ASTA	3354818	1	14.298	PZE-101003135	49	123	68	3	3.16	-
5	768PUB	4,601,553 - 4,601,848	1	17.383	PZA02869-2	46	121	72	4	5.69	*
6	ASTA	4603133	1	17.383	PZE-101005766	50	118	72	3	4.1	-
7	ASTA	5725705	1	21.677	PZE-101009528	50	119	72	2	4.05	-
8	ASTA	5722110	1	21.677	PZE-101009538	51	116	72	4	3.9	-
9	ASTA	7861635	1	27.981	PZE-101013818	58	112	71	2	2.6	-
10	768PUB	8346855	1	30.355	PZA00181-2	57	115	70	1	1.99	-
11	768PUB	8348524	1	30.355	PHM13094-8	58	115	70	0	1.88	-
12	768PUB	8553712	1	31.394	pza00175-2	57	117	67	2	1.03	-
13	ASTA	8629040	1	32.083	PZE-101015471	55	116	69	3	1.9	-
14	LGC	9299221	1	33.688	PZA00731_7	56	122	64	1	0.55	-
15	768PUB	9,298,654 - 9,298,947	1	33.894	PZA00731.6	57	121	64	1	0.4	-
16	ASTA	9430289	1	34.515	PZE-101016971	57	123	60	3	0.22	-
17	768PUB		1	36.625	PZA00566.5	55	100	70	18	4.78	*
18	ASTA	9917427	1	38.247	PZE-101017463	58	120	63	2	0.21	-
19	ASTA	10094684	1	38.713	PZE-101017779	60	119	64	0	0.23	-
20	ASTA	10541301	1	39.126	PZE-101018199	59	119	64	1	0.27	-
21	ASTA	12361008	1	44.791	PZE-101021455	56	131	56	0	1.49	-
22	ASTA	12395556	1	45.204	PZE-101021479	55	129	58	1	1.13	-
23	768PUB	14958485	1	48.61	PHM1653-31	54	133	56	0	2.21	-
24	ASTA	15067244	1	48.816	PZE-101025101	54	133	54	2	2.59	-
25	ASTA	16177692	1	51.574	PZE-101027125	54	130	57	2	1.57	-
26	ASTA	17827802	1	53.795	PZE-101029737	55	128	57	3	1.1	-
27	ASTA	21073937	1	56	PZE-101032991	54	133	55	1	2.39	-
28	ASTA	21983964	1	58.325	PZE-101034091	57	127	56	3	0.82	-
29	ASTA	22462932	1	58.325	PZE-101034578	58	127	55	3	0.89	-
30	ASTA	23053875	1	59.154	PZE-101035341	57	129	56	1	1.07	-
31	ASTA	23614975	1	60.954	PZE-101036318	57	130	54	2	1.57	-
32	ASTA	25100516	1	62.291	PZE-101037854	53	133	53	4	3.05	-
33	ASTA	24506870	1	62.291	PZE-101037191	54	134	53	2	3.03	-
34	ASTA	27804660	1	62.291	PZE-101041178	54	134	54	1	2.79	-
35	ASTA	29682714	1	62.731	PZE-101043600	55	134	53	1	2.83	-
36	ASTA	32606310	1	64.41	PZE-101047239	56	132	53	2	2.27	-
37	ASTA	33464367	1	65.088	PZE-101048744	55	136	51	1	3.85	-
38	ASTA	33677004	1	65.313	PZE-101048890	55	134	51	3	3.4	-
39	ASTA	33835830	1	65.995	PZE-101049120	55	134	52	2	3.1	-
40	LGC	34413314	1	68.337	PZB01662_2	53	125	55	10	1.27	-
41	ASTA	34819020	1	69.72	PZE-101050128	56	131	55	1	1.66	-
42	ASTA	34815421	1	69.723	PZE-101050072	56	132	54	1	2.03	-
43	ASTA	34999039	1	70.586	PZE-101050744	56	119	54	14	0.39	-
44	768PUB	35,583,888 - 35,584,174	1	71.661	PZA00192-6	58	127	58	0	0.5	-
45	ASTA	38637615	1	72.606	PZE-101054457	58	128	55	2	1.01	-
46	768PUB	38554684	1	72.611	PHM4597-14	58	129	55	1	1.13	-
47	ASTA	39860244	1	73.272	PZE-101056007	57	129	55	2	1.23	-
48	ASTA	40361103	1	74.463	PZE-101056684	58	131	53	1	1.86	-
49	ASTA	43130510	1	76.27	PZE-101059325	57	133	52	1	2.59	-
50	ASTA	43685837	1	76.27	PZE-101059784	57	133	50	3	3.22	-
51	LGC	44,227,633 - 45,302,151	1	76.891	PZA02376_1	58	134	51	0	2.98	-
52	ASTA	45791478	1	77.721	PZE-101062246	57	134	50	2	3.43	-
53	768PUB		1	77.721	PM01-0000588	58	134	48	3	4.1	-
54	ASTA	46423357	1	78.342	PZE-101062970	61	123	51	8	1.37	-
55	ASTA	45953841	1	78.548	PZE-101062642	60	132	50	1	2.83	-
56	ASTA	47512946	1	79.169	PZE-101064477	54	133	51	5	3.37	-
57	ASTA	52084117	1	81.058	PZE-101068716	59	134	50	0	3.24	-
58	ASTA	52392200	1	81.471	PZE-101069307	60	132	51	0	2.48	-
59	ASTA	52634016	1	84.223	PZE-101069763	73	119	51	0	4.09	-
60	ASTA	53680816	1	87.849	PZE-101071289	61	130	52	0	1.86	-
61	768PUB	55,457,806 - 55,458,097	1	88.262	PHM2130-29	60	130	53	0	1.59	-
62	LGC	56749319	1	89.302	PZB01062_3	60	128	54	1	1.11	-
63	ASTA	56748814	1	89.304	PZE-101074049	59	127	54	3	1.02	-
64	ASTA	58714456	1	90.087	PZE-101075379	58	127	55	3	0.89	-
65	ASTA	62202046	1	90.337	PZE-101077867	59	130	54	0	1.4	-
66	ASTA	61454400	1	90.75	PZE-101077314	61	127	54	1	1	-
67	ASTA	61910415	1	91.059	PZE-101077670	60	129	53	1	1.46	-
68	768PUB		1	91.369	PZA00378-9	59	130	53	1	1.64	-
69	768PUB	63,894,865 - 63,895,014	1	91.37	PZA00294-20	59	129	53	2	1.5	-
70	ASTA	63101577	1	91.37	PZE-101078713	59	131	53	0	1.78	-
71	ASTA	64498287	1	91.576	PZE-101079844	57	131	53	2	1.96	-
72	ASTA	65092427	1	91.576	PZE-101080379	58	131	53	1	1.86	-
73	ASTA	68761556	1	93.25	PZE-101081568	57	131	52	3	2.22	-
74	ASTA	69013637	1	93.25	PZE-101081679	59	132	52	0	2.22	-
75	ASTA	69759910	1	93.456	PZE-101082523	58	133	52	0	2.47	-
76	ASTA	69846078	1	93.662	PZE-101082552	58	132	53	0	2.02	-
77	ASTA	70146640	1	93.662	PZE-101082812	58	131	53	1	1.86	-
78	ASTA	82176764	1	94.744	PZE-101090535	53	135	54	1	3.25	-
79	768PUB	73,254,991 - 73,255,102	1	97.567	PHM5481-94	63	127	51	2	1.9	-
80	ASTA	74272111	1	97.99	PZE-101085101	63	127	51	2	1.9	-
81	ASTA	80961673	1	100.116	PZE-101089347	67	126	49	1	3.09	-
82	ASTA	82712263	1	101.284	PZE-101090870	67	126	47	3	3.93	-
83	By Design	85026070	1	102.432	S1_85016181	67	130	46	0	4.82	*
84	ASTA	86616655	1	103.941	PZE-101093639	69	124	45	5	5.26	*
85	ASTA	87170288	1	104.553	PZE-101093863	66	128	48	1	3.49	-
86	ASTA	91198475	1	105.569	PZE-101099263	65	127	48	3	3.22	-
87	ASTA	92250976	1	105.808	PZE-101094324	65	129	48	1	3.45	-
88	ASTA	95668149	1	106.54	PZE-101096958	62	131	47	3	3.89	-
89	768PUB		1	106.887	PM01-000062H	64	123	48	8	2.69	-
90	ASTA	102949392	1	107.244	PZE-101103230	63	130	48	2	3.37	-
91	ASTA	105960324	1	107.257	PZE-101104637	62	131	49	1	3.05	-
92	ASTA	108629453	1	107.276	PZE-101105979	63	130	49	1	2.96	-
93	768PUB	107373331	1	107.473	PHM3463-18	62	130	48	3	3.3	-
94	ASTA	102099025	1	107.649	PZE-101102819	63	130	48	2	3.37	-
95	ASTA	107195626	1	107.669	PZE-101105288	62	122	47	12	2.68	-
96	ASTA	98769935	1	107.669	PZE-101101518	64	131	47	1	4.04	-
97	ASTA	104531255	1	107.875	PZE-101103937	62	117	49	15	1.64	-
98	ASTA	124449399	1	108.279	PZE-101112660	63	125	47	8	3.14	-
99	768PUB	120,856,289 - 120,856,571	1	108.288	PZA00010-5	63	131	48	1	3.51	-
100	ASTA	123325678	1	108.288	PZE-101112285	63	132	39	9	8.77	**
101	ASTA	141282909	1	108.288	PZE-101117018	63	132	48	0	3.67	-
102	ASTA	116084171	1	108.298	PZE-101108844	62	132	48	1	3.62	-
103	ASTA	148765964	1	108.5	PZE-101120831	61	132	48	2	3.6	-
104	ASTA	145974901	1	108.7	PZE-101118670	60	134	48	1	3.98	-
105	ASTA	119800331	1	108.804	PZE-101110859	61	132	48	2	3.6	-
106	ASTA	151092096	1	108.906	PZE-101122121	62	133	48	0	3.79	-
107	ASTA	141751375	1	109.113	PZE-101117251	60	132	49	2	3.2	-
108	ASTA	152096386	1	109.113	PZE-101122455	62	131	49	1	3.05	-
109	ASTA	153711777	1	109.526	PZE-101122861	63	132	48	0	3.67	-
110	ASTA	154328476	1	110.054	PZE-101123210	62	132	47	2	4.06	-
111	ASTA	159431994	1	110.56	PZE-101126017	63	128	47	5	3.51	-
112	ASTA	165422435	1	110.877	PZE-101129564	62	132	47	2	4.06	-
113	ASTA	161473961	1	111.179	PZE-100001428	62	134	46	1	4.91	*
114	ASTA	166946660	1	111.579	PZE-101130533	61	132	47	3	4.03	-
115	ASTA	172302062	1	111.592	PZE-101133204	63	132	47	1	4.12	-
116	LGC		1	111.592	PZA02135_2	64	132	46	1	4.68	*
117	ASTA	174049594	1	112.213	PZE-101134523	63	131	48	1	3.51	-
118	ASTA	175324494	1	112.835	PZE-101135589	63	133	46	1	4.77	*
119	ASTA	176085484	1	113.041	PZE-101136154	63	133	47	0	4.28	-
120	ASTA	178037572	1	113.871	PZE-101137544	63	133	47	0	4.28	-
121	ASTA	179750409	1	114.138	PZE-101138790	63	131	48	1	3.51	-
122	ASTA	180716847	1	114.696	PZE-101139952	63	131	48	1	3.51	-
123	ASTA	180428391	1	114.698	PZE-101139638	64	131	48	0	3.59	-
124	ASTA	181669237	1	115.18	PZE-101140619	59	132	47	5	4.05	-
125	ASTA	182875470	1	116.152	PZE-101141819	62	131	49	1	3.05	-
126	768PUB	183832714	1	116.358	PHM1968-22	62	130	49	2	2.9	-
127	ASTA	183811347	1	116.358	PZE-101142488	63	130	49	1	2.96	-
128	ASTA	184645898	1	116.564	PZE-101143217	61	132	49	1	3.19	-
129	768PUB	184016827	1	116.564	PHM5622-21	62	132	49	0	3.21	-
130	ASTA	187414806	1	117.394	PZE-101144216	63	128	48	4	3.09	-
131	ASTA	187665811	1	118.015	PZE-101144427	61	131	51	0	2.31	-
132	768PUB	188,048,755 - 188,049,047	1	118.636	PHM17698-8	59	131	50	3	2.69	-
133	ASTA	188048994	1	118.636	PZE-101144838	61	132	50	0	2.81	-
134	ASTA	188059960	1	118.636	PZE-101144895	61	131	49	2	3.02	-
135	ASTA	188150459	1	118.636	PZE-101145417	61	131	50	1	2.65	-
136	ASTA	195184222	1	123.322	PZE-101151522	59	131	53	0	1.78	-
137	ASTA	195945019	1	123.735	PZE-101152541	57	133	53	0	2.31	-
138	ASTA	195517489	1	123.942	PZE-101152052	58	132	53	0	2.02	-
139	ASTA	196790527	1	124.148	PZE-101153556	58	131	54	0	1.62	-
140	ASTA	197420112	1	124.354	PZE-101154189	59	127	53	4	1.24	-
141	ASTA	197692393	1	124.767	PZE-101154578	60	128	54	1	1.11	-
142	ASTA	197891502	1	124.973	PZE-101154881	60	129	53	1	1.46	-
143	ASTA	198688391	1	125.387	PZE-101155681	61	127	54	1	1	-
144	ASTA	198766382	1	125.387	PZE-101155708	62	127	54	0	1.02	-
145	ASTA	199521690	1	125.8	PZE-101156601	62	125	54	2	0.87	-
146	ASTA	199687885	1	125.8	PZE-101157038	64	125	50	4	2.15	-
147	ASTA	200899747	1	126.421	PZE-101158959	64	126	52	1	1.6	-
148	ASTA	200669759	1	126.421	PZE-101158547	65	126	52	0	1.72	-
149	ASTA	201513105	1	126.421	PZE-101159230	65	125	52	1	1.66	-
150	ASTA	203759870	1	127.292	PZE-101161094	66	123	52	2	1.73	-
151	LGC	204299572	1	130.876	PZA01963_15	54	130	52	7	2.47	-
152	ASTA	206385096	1	134.443	PZE-101163046	63	126	53	1	1.24	-
153	ASTA	207270565	1	134.66	PZE-101163953	62	127	52	2	1.53	-
154	ASTA	207096717	1	134.883	PZE-101163755	62	128	51	2	1.94	-
155	ASTA	207557874	1	135.325	PZE-101164237	63	128	52	0	1.69	-
156	ASTA	208762526	1	136.365	PZE-101165483	60	123	54	6	0.65	-
157	ASTA	210043371	1	137.404	PZE-101166754	63	126	52	2	1.51	-
158	ASTA	213030154	1	138.868	PZE-101169494	65	124	49	5	2.57	-
159	ASTA	213964714	1	140.121	PZE-101170476	63	117	54	9	0.69	-
160	ASTA	214373963	1	140.952	PZE-101170828	64	127	52	0	1.68	-
161	ASTA	214975936	1	141.158	PZE-101171300	62	128	52	1	1.64	-
162	ASTA	215256226	1	141.364	PZE-101171655	62	129	52	0	1.75	-
163	ASTA	215893016	1	141.778	PZE-101172239	61	131	50	1	2.65	-
164	ASTA	217167194	1	142.819	PZE-101173330	61	130	50	2	2.5	-
165	ASTA	222199847	1	143.508	PZE-101177112	61	125	52	5	1.29	-
166	ASTA	223691480	1	147.216	PZE-101178657	61	128	51	3	1.9	-
167	ASTA	223692782	1	147.216	PZE-101178662	61	129	51	2	2.03	-
168	768PUB	224,143,703 - 224,143,957	1	148.255	PZA00403-5	61	130	51	1	2.17	-
169	ASTA	224145093	1	148.255	PZE-101179591	61	128	51	3	1.9	-
170	768PUB	225,195,156 - 225,195,436	1	148.668	PZA00658-19	61	131	49	2	3.02	-
171	ASTA	225188001	1	148.668	PZE-101180803	62	131	48	2	3.46	-
172	ASTA	227499850	1	150.342	PZE-101182771	59	134	49	1	3.62	-
173	768PUB	227498652	1	150.548	PHM2478-22	60	131	50	2	2.66	-
174	ASTA	228477723	1	151.588	PZE-101183799	57	134	51	1	3.09	-
175	ASTA	231020291	1	152.209	PZE-101186536	54	135	52	2	3.52	-
176	ASTA	234373717	1	152.622	PZE-101188920	56	135	51	1	3.45	-
177	ASTA	235707130	1	153.662	PZE-101189834	58	131	50	4	2.75	-
178	ASTA	236633249	1	154.283	PZE-101190568	56	135	51	1	3.45	-
179	ASTA	240925145	1	155.533	PZE-101194070	56	137	50	0	4.25	-
180	ASTA	242970720	1	156.154	PZE-101195479	53	138	50	2	5.16	*
181	ASTA	244885792	1	156.986	PZE-101196709	53	140	48	2	6.52	**
182	768PUB		1	161.057	PM01-000014T	55	137	49	2	4.82	*
183	ASTA	250260813	1	161.059	PZE-101203754	54	137	50	2	4.65	*
184	ASTA	249515710	1	161.517	PZE-101200344	52	131	52	8	3.1	-
185	ASTA	252796012	1	163.356	PZE-101201288	51	142	50	0	6.93	**
186	ASTA	255377519	1	165.315	PZE-101206289	54	133	51	5	3.37	-
187	ASTA	255893919	1	166.308	PZE-101206740	55	119	50	19	1.1	-
188	ASTA	256549528	1	166.492	PZE-101207166	59	132	50	2	2.87	-
189	ASTA	258440928	1	170.89	PZE-101208775	54	114	68	7	1.93	-
190	ASTA	259440409	1	176.896	PZE-101210110	58	129	55	1	1.13	-
191	768PUB	262,785,567 - 262,785,863	1	178.399	PHM5526-25	61	128	52	2	1.61	-
192	ASTA	263275976	1	179.02	PZE-101213233	61	126	54	2	0.91	-
193	ASTA	267016845	1	181.746	PZE-101215826	63	108	51	21	1.46	-
194	768PUB	269,091,386 - 269,091,570	1	183.158	PZA00364-2	63	127	50	3	2.22	-
195	ASTA	270120915	1	183.571	PZE-101218765	66	120	49	8	2.57	-
196	ASTA	269184021	1	184.119	PZE-101217941	64	125	48	6	2.87	-
197	ASTA	270476577	1	185.394	PZE-101218966	68	128	44	3	5.87	*
198	By Design	272287504	1	188.231	S1_272220818	67	127	48	1	3.58	-
199	ASTA	273964464	1	190.22	PZE-101222779	64	123	51	5	1.69	-
200	ASTA	275291352	1	191.536	PZE-101224534	67	120	52	4	1.89	-
201	ASTA	276485027	1	192.84	PZE-101226363	65	120	54	4	1.02	-
202	ASTA	278673940	1	194.281	PZE-101228874	70	113	53	7	2.87	-
203	ASTA	279477332	1	195.466	PZE-101229884	73	113	54	3	3.82	-
204	768PUB	282864090	1	200.402	PHM595-30	69	114	59	1	1.64	-
205	ASTA	282538661	1	200.663	PZE-101234638	67	114	59	3	1.13	-
206	768PUB	282,864,242 - 282,864,143	1	200.916	PZA02957-5	69	113	60	1	1.73	-
207	ASTA	283434881	1	201.434	PZE-101235826	67	113	62	1	1.26	-
208	ASTA	283934264	1	202.059	PZE-101236380	68	114	57	4	1.52	-
209	768PUB	285721377	1	205.908	PHM18705-23	73	106	64	0	4.62	*
210	ASTA	285711939	1	207.293	PZE-101237912	69	109	62	3	2.43	-
211	ASTA	285602757	1	207.608	PZE-101237862	68	110	62	3	1.97	-
212	ASTA	286582762	1	209.307	PZE-101239143	65	115	60	3	0.62	-
213	ASTA	287874930	1	211.27	PZE-101241048	64	116	60	3	0.4	-
214	ASTA	290759900	1	216.024	PZE-101244646	66	115	62	0	0.83	-
215	ASTA	291610995	1	216.645	PZE-101245575	66	114	63	0	1	-
216	ASTA	292601803	1	220.507	PZE-101246842	67	116	60	0	0.9	-
217	ASTA	293404559	1	223.381	PZE-101248001	61	110	58	14	0.43	-
218	LGC	294809497	1	228.162	PZA00623_3	61	117	57	8	0.14	-
219	ASTA	294974385	1	230.774	PZE-101249703	64	116	61	2	0.41	-
220	768PUB	294,809,057 - 294,809,297	1	230.992	PZA00623-2	67	115	61	0	0.99	-
221	ASTA	295619529	1	232.666	PZE-101250840	65	117	60	1	0.47	-
222	ASTA	295968730	1	233.287	PZE-101251367	64	120	59	0	0.24	-
223	LGC	296101164	1	235.39	PHM174_13	55	119	58	11	0.23	-
224	ASTA	296340455	1	237.925	PZE-101251928	61	118	60	4	0.05	-
225	ASTA	296701503	1	237.925	PZE-101252072	63	118	60	2	0.18	-
226	768PUB	296985733	1	238.817	pza00856-2	61	120	58	4	0.08	-
227	768PUB	299277095	1	244.411	PHM7616-35	65	116	60	2	0.54	-
228	ASTA	299175421	1	244.411	PZE-101255595	65	116	59	3	0.57	-
229	ASTA	299362060	1	244.824	PZE-101255854	63	120	57	3	0.3	-
230	ASTA	299980450	1	245.864	PZE-101256470	61	121	60	1	0.01	-
231	ASTA	299830208	1	245.87	PZE-101256370	62	120	59	2	0.08	-
232	ASTA	299639032	1	246.497	PZE-101256290	63	122	57	1	0.31	-
233	IDT (SSR)		2	0	phi402893	66	126	51	0	2.19	-
234	ASTA	1141187	2	1.267	PZE-102000846	67	122	54	0	1.4	-
235	ASTA	2043656	2	7.682	PZE-102003236	66	118	53	6	1.43	-
236	ASTA	2043524	2	7.682	PZE-102003235	70	119	52	2	2.73	-
237	768PUB	2,544,433 - 2,544,719	2	10.536	PHM13440.11	69	119	52	3	2.42	-
238	ASTA	3231212	2	11.392	PZE-102006128	68	121	52	2	2.13	-
239	ASTA	3396230	2	12.031	PZE-102006513	66	124	50	3	2.4	-
240	ASTA	3703096	2	14.204	PZE-102007336	68	125	50	0	2.87	-
241	ASTA	3864279	2	14.681	PZE-102007615	65	125	50	3	2.29	-
242	LGC	4199002	2	15.868	PZA00613_22	57	124	49	13	1.97	-
243	ASTA	4371619	2	17.461	PZE-102009755	63	130	49	1	2.96	-
244	768PUB		2	18.586	PM01-000033M	62	132	47	2	4.06	-
245	768PUB	5,845,426 - 5,845,721	2	20.923	PHM3309.8	65	131	47	0	4.15	-
246	LGC	7529311	2	29.431	PZA03700_2	63	129	50	1	2.45	-
247	ASTA	9985464	2	38.696	PZE-102021451	66	120	51	6	1.94	-
248	ASTA	10491106	2	39.548	PZE-102022207	71	119	52	1	3.05	-
249	768PUB	10522832	2	39.961	PHM5822-15	71	121	51	0	3.3	-
250	ASTA	12074309	2	44.573	PZE-102026049	65	127	50	1	2.45	-
251	ASTA	13292280	2	48.501	PZE-102028040	60	136	46	1	5.34	*
252	ASTA	13839434	2	50.405	PZE-102029697	60	131	47	5	3.84	-
253	768PUB	13858976	2	50.611	PZA00108.12	63	130	48	2	3.37	-
254	ASTA	13871252	2	50.611	PZE-102029739	65	129	48	1	3.45	-
255	ASTA	14349419	2	52.285	PZE-102030702	64	128	49	2	2.8	-
256	ASTA	14459528	2	52.285	PZE-102030819	66	126	49	2	2.9	-
257	768PUB	14848101	2	53.327	pza01753-1	62	129	49	3	2.76	-
258	ASTA	15981111	2	54.579	PZE-102033535	64	129	49	1	2.92	-
259	ASTA	17778805	2	57.987	PZE-102036053	62	131	50	0	2.67	-
260	ASTA	18832134	2	59.238	PZE-102037806	58	133	50	2	3.12	-
261	IDT (SSR)	18941322	2	60.069	umc1845	60	133	49	1	3.38	-
262	LGC	20542572	2	61.109	PZA00497_4	59	132	51	1	2.53	-
263	ASTA	20610096	2	61.731	PZE-102039914	58	135	48	2	4.32	-
264	768PUB	22692851	2	66.251	PHM6111-5	56	135	48	4	4.56	-
265	ASTA	23128919	2	66.251	PZE-102043638	58	136	44	5	6.5	**
266	ASTA	23619214	2	67.136	PZE-102044689	57	132	50	4	3.03	-
267	ASTA	25183053	2	70.564	PZE-102046980	52	141	49	1	6.69	**
268	ASTA	29033709	2	72.139	PZE-102050762	53	138	52	0	4.49	-
269	ASTA	29275894	2	72.66	PZE-102050935	51	140	50	2	6.32	**
270	ASTA	29894336	2	73.19	PZE-102051933	52	141	50	0	6.29	**
271	ASTA	30936027	2	73.626	PZE-102052725	51	140	50	2	6.32	**
272	768PUB	32963052	2	74.304	PZA02058-1	52	139	51	1	5.36	*
273	ASTA	31828778	2	74.52	PZE-102053654	52	140	50	1	6	**
274	768PUB	33,973,963 - 33,974,246	2	74.733	PZA00061-1	52	139	50	2	5.71	*
275	ASTA	34989836	2	74.733	PZE-102056416	52	132	50	9	3.88	-
276	ASTA	37400189	2	75.302	PZE-102058138	52	130	51	10	3.14	-
277	ASTA	35900051	2	75.323	PZE-102056984	52	137	50	4	5.16	*
278	ASTA	40058255	2	77.591	PZE-102061118	51	142	48	2	7.75	**
279	ASTA	40250053	2	78.006	PZE-102061320	53	142	48	0	7.12	**
280	ASTA	40635075	2	78.006	PZE-102061615	53	141	45	4	8.27	**
281	ASTA	41652061	2	78.627	PZE-102062683	50	141	48	4	7.77	**
282	ASTA	41638903	2	78.627	PZE-102062629	53	141	49	0	6.39	**
283	ASTA	46395990	2	79.877	PZE-102067907	46	140	50	7	8.34	**
284	By Design	48188406	2	80.083	bnlg108_646	52	140	51	0	5.64	*
285	ASTA	53210115	2	81.124	PZE-102072914	48	141	50	4	7.77	**
286	ASTA	59390125	2	82.164	PZE-102076812	53	136	50	4	4.63	*
287	ASTA	59988335	2	82.164	PZE-102077128	53	138	50	2	5.16	*
288	ASTA	58997634	2	82.164	PZE-102076654	54	128	50	11	2.62	-
289	ASTA	64125362	2	83.31	PZE-102080019	52	142	47	2	7.88	**
290	768PUB	63556012	2	83.93	PHM3457-6	54	138	47	4	6.14	**
291	768PUB	63554861	2	83.998	PHM10321-11	56	127	47	13	3.21	-
292	ASTA	64863469	2	84.22	PZE-102080478	54	140	47	2	6.72	**
293	ASTA	72845071	2	84.446	PZE-102084461	52	138	47	6	6.63	**
294	ASTA	81073191	2	84.652	PZE-102087125	52	142	46	3	8.37	**
295	ASTA	74717659	2	84.654	PZE-102085154	54	141	46	2	7.51	**
296	ASTA	92276310	2	85.273	PZE-102089752	51	139	48	5	6.8	**
297	ASTA	94442369	2	85.273	PZE-102090176	53	139	48	3	6.22	**
298	ASTA	98052933	2	85.273	PZE-102091035	55	138	48	2	5.49	*
299	ASTA	89493536	2	85.273	PZE-102089051	56	139	48	0	5.57	*
300	ASTA	120274666	2	85.479	PZE-102100460	56	137	48	2	5.05	*
301	ASTA	108679530	2	85.584	PZE-102094583	57	137	47	2	5.35	*
302	ASTA	111174221	2	85.685	PZE-102096215	53	138	47	5	6.37	**
303	768PUB	107819756	2	85.685	PHM4880-179	55	139	47	2	6.21	**
304	768PUB	131,586,379 - 131,586,674	2	86.098	PZA02966.11	55	139	47	2	6.21	**
305	ASTA	129933979	2	86.098	PZE-102104318	57	129	47	10	3.54	-
306	ASTA	132492420	2	86.098	PZE-102105564	57	139	47	0	5.86	*
307	ASTA	135241890	2	86.339	PZE-102106504	55	138	48	2	5.49	*
308	ASTA	143674058	2	87.04	PZE-102110466	56	139	46	2	6.51	**
309	ASTA	144708381	2	87.661	PZE-102111257	59	135	46	3	5.16	*
310	ASTA	146685173	2	87.96	PZE-102112249	56	138	46	3	6.23	**
311	ASTA	151432516	2	88.451	PZE-102114559	59	136	47	1	4.91	*
312	768PUB	152870249	2	88.565	PZA01280.2	57	135	46	5	5.32	*
313	By Design	153763499	2	89.201	S2_153128978	60	135	45	3	5.62	*
314	ASTA	160393356	2	89.615	PZE-102118767	59	136	46	2	5.39	*
315	LGC	160621111	2	89.821	PZA02939_10	57	139	46	1	6.36	**
316	ASTA	166507002	2	90.027	PZE-102121137	59	137	46	1	5.63	*
317	768PUB	170,861,876 - 170,861,593	2	90.329	PHM635-23	57	138	46	2	6.09	**
318	ASTA	171026232	2	90.646	PZE-102123089	57	137	48	1	4.9	*
319	768PUB	173,043,749 - 173,044,009	2	90.983	PZA00637-4	56	137	46	4	5.96	*
320	By Design	172227605	2	91.681	PZE02171586552	55	141	45	2	7.8	**
321	ASTA	171518708	2	92.298	PZE-102123500	57	137	46	3	5.82	*
322	By Design	171591935	2	92.302	PZE02171591935	56	139	47	1	6.02	**
323	ASTA	180636709	2	94.456	PZE-102129854	61	129	51	2	2.03	-
324	ASTA	187087652	2	101.189	PZE-102137574	69	122	50	2	3.03	-
325	ASTA	187289598	2	101.825	PZE-102137862	65	121	50	7	2.06	-
326	By Design	188098255	2	103.091	S2_187449158	67	119	52	5	1.89	-
327	By Design	189523169	2	103.713	S2_188872782	69	122	51	1	2.69	-
328	ASTA	189874518	2	104.394	PZE-102141929	67	118	52	6	1.9	-
329	768PUB	190810134	2	107.133	PZA02890.4	70	122	47	4	4.53	-
330	ASTA	191524911	2	107.564	PZE-102143943	71	123	48	1	4.44	-
331	ASTA	192025993	2	109.057	PZE-102144397	71	124	46	2	5.39	*
332	ASTA	221501477	2	112.284	PZE-102178232	71	126	43	3	7.13	**
333	768PUB	196173636	2	113.35	PHM3055-9	73	124	43	3	7.77	**
334	By Design	196361259	2	113.608	S2_195711367	76	122	43	2	9.07	**
335	ASTA	197033673	2	114.025	PZE-102149655	78	121	44	0	9.52	***
336	ASTA	197161399	2	114.231	PZE-102149810	75	122	44	2	8.01	**
337	ASTA	198486886	2	115.061	PZE-102151305	80	120	43	0	11.3	****
338	ASTA	198644357	2	115.531	PZE-102151356	75	122	43	3	8.6	**
339	ASTA	199313495	2	116.737	PZE-102152004	74	117	47	5	6.19	**
340	ASTA	199548050	2	118.752	PZE-102152286	72	125	44	2	6.84	**
341	768PUB	199515656	2	120.165	PHM7953.11	77	121	43	2	9.6	***
342	ASTA	201863086	2	120.698	PZE-102153944	76	121	43	3	9.09	**
343	768PUB	200742864	2	120.698	PZA02731-1	77	118	43	5	9.73	***
344	ASTA	204167379	2	121.893	PZE-102156050	75	117	44	7	8.16	**
345	LGC	205697120	2	125.76	PZA03165_1	70	126	43	4	6.81	**
346	768PUB	206,267,787 - 206,268,086	2	126.958	PHM2773-30	72	123	43	5	7.34	**
347	ASTA	206786561	2	128.712	PZE-102159951	71	122	44	6	6.36	**
348	ASTA	207555375	2	129.201	PZE-102160834	72	124	43	4	7.38	**
349	ASTA	209281219	2	132.279	PZE-102163261	70	124	46	3	5.07	*
350	ASTA	211539534	2	136.325	PZE-102166542	68	124	48	3	3.6	-
351	ASTA	211822483	2	136.893	PZE-102166741	70	122	47	4	4.53	-
352	768PUB	211953057	2	137.185	PZA02964-7	67	124	47	5	3.78	-
353	ASTA	212563308	2	139.717	PZE-102168018	66	121	50	6	2.27	-
354	ASTA	213833395	2	141.53	PZE-102169535	65	120	50	8	2.02	-
355	ASTA	213827983	2	141.539	PZE-102169510	68	121	50	4	2.75	-
356	ASTA	215327204	2	142.82	PZE-102171277	70	121	51	1	2.98	-
357	ASTA	216326796	2	145.273	PZE-102172713	64	120	55	4	0.68	-
358	IDT (SSR)	219773502	2	156.75	umc1516	60	95	77	11	10.09	***
359	ASTA	220330507	2	163.398	PZE-102177071	62	122	57	2	0.24	-
360	ASTA	223104085	2	166.846	PZE-102179558	62	120	55	6	0.45	-
361	ASTA	224390771	2	168.654	PZE-102181292	59	125	55	4	0.64	-
362	ASTA	227367704	2	171.871	PZE-102184104	59	128	54	2	1.14	-
363	ASTA	229541203	2	172.284	PZE-102184995	58	129	54	2	1.33	-
364	ASTA	229914290	2	173.388	PZE-102185458	60	124	56	3	0.4	-
365	ASTA	231537337	2	176.219	PZE-102186665	62	119	58	4	0.14	-
366	LGC	231605015	2	177.765	PZA02727_1	58	125	60	0	0.23	-
367	768PUB		2	179.266	PM01-0000156	62	119	58	4	0.14	-
368	ASTA	232382300	2	180.003	PZE-102187687	61	115	62	5	0.28	-
369	ASTA	232774405	2	180.712	PZE-102187906	66	108	61	8	1.75	-
370	ASTA	233642074	2	184.288	PZE-102189414	58	118	56	11	0.1	-
371	ASTA	233783969	2	184.791	PZE-102189702	63	118	59	3	0.2	-
372	LGC	234881890	2	187.855	PZA02170_1	59	115	66	3	0.82	-
373	768PUB	235392629	2	190.317	PHM3094-23	61	116	64	2	0.41	-
374	768PUB	236677675	2	193.568	pzd00022-5	66	115	61	1	0.8	-
375	IDT (SSR)	1591831	3	0	umc1746	77	115	50	1	6.62	**
376	ASTA	1773119	3	1.312	PZE-103001622	78	112	51	2	7.25	**
377	ASTA	2383457	3	6.553	PZE-103003116	79	113	48	3	8.82	**
378	By Design	2783036	3	9.04	PZE0302745685	83	115	45	0	12.58	****
379	By Design	2812544	3	10.085	S3_2812544	79	120	43	1	10.73	****
380	ASTA	5752565	3	26.569	PZE-103010389	87	113	41	2	18.49	*******
381	768PUB	5986437	3	28.164	pza03527-1	86	116	37	4	20.3	*******
382	ASTA	6956687	3	31.812	PZE-103013405	81	119	35	8	18.05	******
383	768PUB	6928333	3	31.812	pza00749-1	83	118	36	6	18.65	*******
384	ASTA	8891715	3	36.527	PZE-103015786	89	112	41	1	20.38	*******
385	ASTA	8979287	3	37.392	PZE-103015842	81	114	42	6	13.18	****
386	ASTA	10286510	3	42.56	PZE-103017599	76	122	39	6	11.76	****
387	ASTA		3	44.324	PHM4204-69	79	128	36	0	15.91	******
388	ASTA	10515672	3	46.171	PZE-103018049	81	119	41	2	13.32	****
389	ASTA	11536001	3	47.333	PZE-103019324	74	120	43	6	8.15	**
390	LGC	12138780	3	48.139	PZA00508_2	78	119	42	4	10.85	****
391	ASTA	12430246	3	50.053	PZE-103020134	80	116	42	5	12.29	****
392	ASTA	13285444	3	53.563	PZE-103021174	76	128	38	1	12.74	****
393	ASTA	14236315	3	54.189	PZE-103022202	75	130	36	2	14.12	*****
394	ASTA	15434923	3	54.584	PZE-103023379	76	130	36	1	14.56	*****
395	ASTA	17616694	3	54.599	PZE-103024934	73	128	36	6	13.08	****
396	ASTA	16117688	3	54.603	PZE-103023690	75	129	37	2	13.18	****
397	ASTA	18013572	3	54.81	PZE-103025333	75	129	37	2	13.18	****
398	ASTA	18195995	3	55.639	PZE-103025592	72	129	38	4	11.18	****
399	ASTA	21566507	3	57.315	PZE-103028869	79	123	40	1	12.64	****
400	ASTA	22579240	3	58.782	PZE-103030194	76	104	45	18	9.83	***
401	ASTA	23212791	3	61.104	PZE-103031323	75	123	41	4	9.88	***
402	ASTA	23847008	3	61.104	PZE-103031668	75	123	43	2	8.6	**
403	ASTA	24907634	3	61.104	PZE-103032194	76	123	41	3	10.36	***
404	ASTA	24919320	3	61.104	PZE-103032158	77	120	43	3	9.63	***
405	ASTA	26194082	3	61.725	PZE-103033509	77	120	44	2	9.04	**
406	768PUB	28335292	3	62.555	PHM2343.25	76	115	46	6	7.8	**
407	LGC		3	63.805	PZA02255_2	72	122	49	0	4.36	-
408	ASTA	31489332	3	64.518	PZE-103037289	69	123	46	5	4.71	*
409	ASTA	32108241	3	64.621	PZE-103037641	70	124	46	3	5.07	*
410	ASTA	35354441	3	64.728	PZE-103039677	71	124	45	3	5.9	*
411	ASTA	31697293	3	64.881	PZE-103037370	72	121	46	4	5.69	*
412	ASTA	43474617	3	65.847	PZE-103044102	71	122	45	5	5.83	*
413	ASTA	50103462	3	66.361	PZE-103047477	69	121	47	6	4.19	-
414	LGC	49,139,829 - 58,516,016	3	66.706	PZA01447_1	71	124	48	0	4.46	-
415	ASTA	51289718	3	67.178	PZE-103048210	71	123	46	3	5.36	*
416	768PUB		3	67.209	PM01-00004EP	72	124	45	2	6.25	**
417	768PUB	57,091,254 - 57,091,102	3	67.712	PZA00627.1	69	125	45	4	5.33	*
418	ASTA	99398463	3	67.74	PZE-103063232	68	126	44	5	5.66	*
419	LGC	67698281	3	67.74	PZA02134_3	69	123	45	6	5.2	*
420	768PUB	57658262	3	67.74	PZA02589.1	69	127	44	3	6.02	**
421	ASTA	93998545	3	67.742	PZE-103065281	69	126	43	5	6.5	**
422	ASTA	108809207	3	67.925	PZE-103060872	69	125	44	5	5.86	*
423	ASTA	64581391	3	68.052	PZE-103054685	69	126	46	2	4.89	*
424	ASTA	92164501	3	68.052	PZE-103066053	69	122	46	6	4.67	*
425	ASTA	66663690	3	68.186	PZE-103055453	70	122	45	6	5.48	*
426	ASTA	72936983	3	68.339	PZE-103057464	70	127	44	2	6.31	**
427	ASTA	106396841	3	68.379	PZE-103061576	63	128	44	8	4.95	*
428	ASTA	113920143	3	68.771	PZE-103069689	67	125	45	6	4.8	*
429	ASTA	86788308	3	68.783	PZE-103068739	69	125	44	5	5.86	*
430	ASTA	85675777	3	69.184	PZE-103069221	69	118	47	9	4.15	-
431	ASTA	85675752	3	69.39	PZE-103069222	69	127	46	1	4.97	*
432	ASTA	115024910	3	69.825	PZE-103070612	69	126	44	4	5.94	*
433	ASTA	121690394	3	69.995	PZE-103073496	71	119	45	8	5.79	*
434	ASTA	114805425	3	70.423	PZE-103070266	73	115	43	12	7.8	**
435	ASTA	116383429	3	70.544	PZE-103071053	71	123	42	7	7.55	**
436	ASTA	125130180	3	71.251	PZE-103075454	71	127	44	1	6.62	**
437	ASTA	127029309	3	71.251	PZE-103076372	71	128	42	2	7.91	**
438	768PUB	128816403	3	71.794	PHM15449-10	70	114	44	15	5.93	*
439	ASTA	133201195	3	72.078	PZE-103080303	71	123	44	5	6.39	**
440	ASTA	130071698	3	72.092	PZE-103078702	69	121	46	7	4.64	*
441	ASTA	136112521	3	72.469	PZE-103082105	68	127	45	3	5.22	*
442	ASTA	131731315	3	72.491	PZE-103079483	68	123	44	8	5.42	*
443	ASTA	132290794	3	72.491	PZE-103079771	68	128	45	2	5.32	*
444	ASTA	138806235	3	72.762	PZE-103083874	70	124	45	4	5.57	*
445	ASTA	142932082	3	73.048	PZE-103086306	69	124	47	3	4.3	-
446	ASTA	141471396	3	73.049	PZE-103085447	68	123	47	5	3.97	-
447	By Design	146124911	3	73.941	PZE03142269142	70	124	47	2	4.59	-
448	ASTA	143890282	3	74.641	PZE-103086917	69	123	47	4	4.26	-
449	ASTA	144124786	3	74.663	PZE-103087007	71	124	46	2	5.39	*
450	768PUB	146678162	3	75.5	pza00920-1	69	126	46	2	4.89	*
451	ASTA	149594849	3	76.216	PZE-103090563	66	127	45	5	4.78	*
452	ASTA	149602751	3	76.243	PZE-103090601	67	129	45	2	5.22	*
453	ASTA	150209184	3	76.663	PZE-103091108	68	128	45	2	5.32	*
454	ASTA	153960946	3	77.946	PZE-103092933	65	131	43	4	6.26	**
455	ASTA	156527646	3	78.72	PZE-103096615	67	123	46	7	4.16	-
456	768PUB	156832968	3	79.159	PZA00827.1	63	132	43	5	6.2	**
457	ASTA	158554753	3	79.6	PZE-103098233	65	131	44	3	5.69	*
458	LGC	158933239	3	82.296	PZB02179_1	59	133	44	7	5.72	*
459	ASTA	159904113	3	84.469	PZE-103099719	61	134	45	3	5.4	*
460	768PUB	161300791	3	84.997	PHM9914-11	62	133	45	3	5.22	*
461	ASTA	160120837	3	86.205	PZE-103100061	67	111	47	18	3.6	-
462	ASTA	164293007	3	87.619	PZE-103102727	65	129	47	2	3.89	-
463	ASTA	165065914	3	87.657	PZE-103103387	64	129	46	4	4.22	-
464	ASTA	164213990	3	88.387	PZE-103102712	61	131	47	4	3.85	-
465	ASTA	165905595	3	88.971	PZE-103104448	62	134	44	3	5.97	*
466	ASTA	166133620	3	89.207	PZE-103104752	64	133	44	2	5.91	*
467	768PUB	166420596	3	89.444	pza01396-1	61	134	43	5	6.5	**
468	ASTA	169087927	3	90.59	PZE-103108109	61	133	44	5	5.72	*
469	ASTA	169772116	3	91.296	PZE-103108877	62	131	47	3	3.89	-
470	ASTA	176607694	3	98.607	PZE-103117610	62	131	48	2	3.46	-
471	ASTA	179276741	3	102.043	PZE-103120875	62	128	50	3	2.27	-
472	By Design	179511489	3	104.506	S3_179511489	55	132	53	3	2.43	-
473	By Design	179787864	3	106.341	S3_179735110	62	123	54	4	0.74	-
474	768PUB	180049595	3	107.248	PHM17210-5	62	128	52	1	1.64	-
475	LGC	179,875,994 - 181,687,846	3	108.522	PZA02654_3	63	121	54	5	0.75	-
476	ASTA	180802567	3	109.801	PZE-103123019	60	128	51	4	1.89	-
477	ASTA	180797982	3	109.801	PZE-103122966	61	129	51	2	2.03	-
478	ASTA	181612144	3	110.007	PZE-103123844	60	130	51	2	2.17	-
479	ASTA	182097084	3	110.421	PZE-103124738	58	129	52	4	1.81	-
480	ASTA	182184139	3	110.834	PZE-103125004	60	129	52	2	1.73	-
481	ASTA	183376184	3	112.08	PZE-103125763	60	125	55	3	0.62	-
482	ASTA	183633003	3	112.092	PZE-103125956	59	125	56	3	0.49	-
483	ASTA	184176646	3	112.913	PZE-103126743	54	129	56	4	1.54	-
484	ASTA	185298891	3	114.377	PZE-103128464	58	129	55	1	1.13	-
485	ASTA	186286680	3	114.998	PZE-103129514	56	131	55	1	1.66	-
486	ASTA	188373795	3	116.04	PZE-103132216	57	129	55	2	1.23	-
487	768PUB	187988325	3	116.307	pza00494-2	56	129	56	2	1.2	-
488	ASTA	188728528	3	116.953	PZE-103132991	54	131	57	1	1.73	-
489	ASTA	188434161	3	117.82	PZE-103132492	55	129	57	2	1.23	-
490	ASTA	189299061	3	118.391	PZE-103133286	57	129	55	2	1.23	-
491	ASTA	189748371	3	119.567	PZE-103133859	57	125	59	2	0.37	-
492	ASTA	191246896	3	120.393	PZE-103135771	56	126	58	3	0.63	-
493	ASTA	191388915	3	120.397	PZE-103135938	56	127	58	2	0.73	-
494	768PUB		3	120.637	PM01-0000211	58	109	58	18	0.22	-
495	768PUB	194075686	3	121.852	PHM13673-53	58	126	58	1	0.41	-
496	ASTA	194612654	3	122.266	PZE-103138177	57	124	60	2	0.28	-
497	768PUB	196,112,601 - 196,112,887	3	123.516	PZA02952-10	57	124	59	3	0.3	-
498	ASTA	195991643	3	123.516	PZE-103139833	58	123	59	3	0.16	-
499	ASTA	199628996	3	126.752	PZE-103144282	58	124	61	0	0.18	-
500	ASTA	199556496	3	127.007	PZE-103144159	55	122	62	4	0.51	-
501	By Design	200259195	3	128.024	S3_200187159	58	122	63	0	0.21	-
502	ASTA	201403148	3	130.474	PZE-103147126	60	123	59	1	0.07	-
503	ASTA	201376301	3	130.683	PZE-103146956	57	124	60	2	0.28	-
504	768PUB	201757417	3	131.079	PHM2919-23	57	122	61	3	0.2	-
505	ASTA	201610877	3	131.098	PZE-103147211	60	122	60	1	0.02	-
506		200206675	3	131.928	PZE03200206675	58	121	60	4	0.07	-
507	ASTA	202503292	3	132.231	PZE-103148470	59	110	61	13	0.47	-
508	ASTA	202838764	3	132.549	PZE-103148727	59	121	59	4	0.04	-
509	768PUB	203,651,630 - 203,651,332	3	132.549	PZA03011.6	60	120	60	3	0	-
510	ASTA	205335987	3	136.434	PZE-103151399	59	127	53	4	1.24	-
511	ASTA	207038148	3	138.571	PZE-103154125	59	126	53	5	1.13	-
512	ASTA	208123859	3	140.439	PZE-103155390	55	126	58	4	0.78	-
513	ASTA	209109184	3	142.329	PZE-103156977	57	121	61	4	0.17	-
514	ASTA	208968347	3	142.329	PZE-103156524	58	121	62	2	0.14	-
515	768PUB	209,109,243 - 209,109,537	3	142.336	PHM8828-7	56	121	62	4	0.34	-
516	LGC	209816963	3	142.95	PZA02516_1	56	120	62	5	0.32	-
517	ASTA	210871607	3	143.156	PZE-103159374	56	122	62	3	0.37	-
518	768PUB	210,353,713 - 210,354,014	3	143.16	PHM3352-19	58	123	60	2	0.14	-
519	IDT (SSR)	209727753	3	145.473	mmc0251	63	120	60	0	0.11	-
520	ASTA	211411070	3	148.066	PZE-103160229	60	123	58	2	0.14	-
521	ASTA	211204444	3	149.113	PZE-103159840	57	125	59	2	0.37	-
522	ASTA	211060547	3	149.14	PZE-103159691	55	125	58	5	0.68	-
523	LGC	211802125	3	150.295	PZA02616_1	56	126	60	1	0.55	-
524	ASTA	212913821	3	152.275	PZE-103162566	58	118	63	4	0.25	-
525	ASTA	215079050	3	156.73	PZE-103165542	61	116	62	4	0.21	-
526	768PUB	215,262,531 - 215,262,245	3	157.172	PHM13742.5	61	116	59	7	0.1	-
527	ASTA	217435614	3	159.875	PZE-103169160	67	114	60	2	1.11	-
528	By Design	217889745	3	161.342	S3_217808747	69	111	60	3	2.03	-
529	By Design	217889796	3	161.757	S3_217808798	67	115	61	0	0.99	-
530	ASTA	218569729	3	164.548	PZE-103171398	67	119	55	2	1.23	-
531	ASTA	221386301	3	169.234	PZE-103174950	66	119	54	4	1.21	-
532	ASTA	224574004	3	177.383	PZE-103179078	67	123	52	1	1.93	-
533	768PUB	225,393,806 - 225,394,096	3	178.172	PHM3852-15	65	125	51	2	1.96	-
534	768PUB	226,569,338 - 226,569,625	3	179.357	PZA00143.5	65	125	51	2	1.96	-
535	ASTA	227216904	3	181.16	PZE-103182400	66	119	56	2	0.87	-
536	ASTA	227448331	3	182.777	PZE-103182817	69	117	54	3	2.02	-
537	ASTA	229340005	3	183.037	PZE-103184446	69	117	57	0	1.52	-
538	ASTA	229752682	3	184.717	PZE-103185177	68	119	56	0	1.29	-
539	768PUB	230,833,517 - 230,833,809	3	187.643	PHM13174-18	70	115	55	3	2.29	-
540	LGC	230833786	3	189.107	PZA02423_1	63	106	53	21	1.35	-
541	IDT (SSR)	1,078,840 - 1,080,800	4	0	umc1008	50	129	52	12	3.19	-
542	ASTA	1223013	4	1.75	PZE-104005468	51	133	55	4	3.18	-
543	ASTA	1225525	4	2.043	PZE-104005416	54	116	54	19	0.29	-
544	ASTA	1463791	4	3.302	PZE-104005482	55	131	54	3	2.02	-
545	ASTA	2669265	4	7.861	PZE-104002900	50	137	54	2	4.65	*
546	ASTA	2985173	4	10.74	PZE-104003542	49	134	57	3	3.8	-
547	768PUB	5671957	4	20.461	PHM3301-28	51	134	57	1	3.09	-
548	ASTA	5471376	4	20.461	PZE-104008253	51	134	55	3	3.4	-
549	768PUB	5,470,994 - 5,471,278	4	20.502	PHM3963-33	51	134	56	2	3.23	-
550	ASTA	5714548	4	21.082	PZE-104008414	52	136	55	0	3.53	-
551	ASTA	5828338	4	21.082	PZE-104008503	52	134	55	2	3.1	-
552	ASTA	9898561	4	26.86	PZE-104011339	56	133	53	1	2.45	-
553	ASTA	10094693	4	27.916	PZE-104011650	57	132	53	1	2.13	-
554	ASTA	10235986	4	29.196	PZE-104011903	53	136	52	2	4	-
555	ASTA	10884921	4	30.912	PZE-104012693	53	136	54	0	3.47	-
556	ASTA	11088234	4	31.161	PZE-104012925	53	137	51	2	4.55	-
557	ASTA	11346497	4	31.972	PZE-104013117	52	140	49	2	6.39	**
558	ASTA	14371922	4	37.463	PZE-104014984	49	141	52	1	6.69	**
559	ASTA	14835925	4	37.894	PZE-104015432	51	137	51	4	5.13	*
560	768PUB	17353518	4	39.175	PHM8527-2	51	137	54	1	4.31	-
561	768PUB	17,529,846 - 17,530,136	4	39.689	PHM687-25	51	138	52	2	5.09	*
562	ASTA	18179317	4	40.213	PZE-104018347	52	138	53	0	4.49	-
563	ASTA	19013680	4	42.406	PZE-104018939	54	134	55	0	2.58	-
564	ASTA	21243534	4	43.248	PZE-104019988	51	135	55	2	3.62	-
565	768PUB		4	43.249	pza00139-4	52	131	55	5	2.5	-
566	ASTA	22575944	4	44.535	PZE-104021090	52	130	60	1	1.87	-
567	ASTA	23097583	4	46.449	PZE-104021514	55	126	60	2	0.71	-
568	ASTA	23549531	4	46.9	PZE-104021862	55	127	61	0	0.79	-
569	ASTA	31705828	4	51.004	PZE-104026803	57	114	64	8	0.63	-
570	ASTA	33460646	4	52.677	PZE-104027935	55	120	63	5	0.55	-
571	ASTA	34085658	4	52.679	PZE-104028286	56	122	63	2	0.44	-
572	768PUB	35,950,523 - 35,950,643	4	53.387	PHM4469-13	58	120	65	0	0.44	-
573	ASTA	36018142	4	53.387	PZE-104029735	58	116	65	4	0.62	-
574	768PUB	36,243,539 - 36,243,807	4	53.777	PZA00125.2	59	114	52	18	0.48	-
575	By Design	36751172	4	53.8	PZE0436718269	59	118	65	1	0.45	-
576	By Design	36916244	4	54.259	nc005_341	53	116	65	9	1.25	-
577	ASTA	38988412	4	55.813	PZE-104032101	61	116	65	1	0.55	-
578	ASTA	44985143	4	56.717	PZE-104035257	59	118	64	2	0.31	-
579	ASTA	46354640	4	56.717	PZE-104035759	60	112	65	6	0.92	-
580	LGC	49945184	4	56.923	PZA00445_22	59	116	61	7	0.1	-
581	768PUB	56,340,453 - 56,340,617	4	57.129	PHM1307-11	60	116	63	4	0.28	-
582	ASTA	52044395	4	57.129	PZE-104039786	60	120	63	0	0.11	-
583	768PUB	52,125,792 - 52,126,087	4	57.144	PHM3587.6	59	120	63	1	0.15	-
584	ASTA	62599310	4	57.542	PZE-104043510	59	122	62	0	0.08	-
585	ASTA	64140213	4	57.682	PZE-104044019	59	120	62	2	0.08	-
586	ASTA	60836521	4	57.834	PZE-104042836	60	120	62	1	0.05	-
587	ASTA	59522440	4	58.243	PZE-104042420	62	112	61	8	0.52	-
588	ASTA	69313133	4	58.91	PZE-104046322	60	109	61	13	0.63	-
589	768PUB	71667576	4	58.932	PZA00218.1	60	120	61	2	0.01	-
590	ASTA	79468393	4	59.196	PZE-104050723	60	119	41	23	4.75	*
591	ASTA	77507682	4	59.271	PZE-104049978	60	120	59	4	0.01	-
592	ASTA	76806449	4	59.467	PZE-104049624	59	121	62	1	0.07	-
593	768PUB		4	59.777	PZA00311.4	60	120	62	1	0.05	-
594	ASTA	71599761	4	59.842	PZE-104047203	60	107	62	14	1.02	-
595	ASTA	86530243	4	60.435	PZE-104053903	60	120	62	1	0.05	-
596	ASTA	108526330	4	60.435	PZE-104057462	60	119	62	2	0.07	-
597	ASTA	124258493	4	60.435	PZE-104062764	61	120	62	0	0.05	-
598	ASTA	109547001	4	60.478	PZE-104057788	61	118	62	2	0.11	-
599	ASTA	121470107	4	61.223	PZE-104061623	63	111	62	7	0.84	-
600	ASTA	119427873	4	61.264	PZE-104060727	65	115	62	1	0.67	-
601	ASTA	113091085	4	61.552	PZE-104058720	62	114	62	5	0.42	-
602	ASTA	92820161	4	61.87	PZE-104055857	61	118	62	2	0.11	-
603	ASTA	96567537	4	61.887	PZE-104056820	59	110	59	15	0.28	-
604	LGC	96833645	4	63.556	PZA03231_1	60	118	60	5	0.02	-
605	ASTA	92119897	4	65.23	PZE-104055631	61	119	62	1	0.07	-
606	ASTA	124979644	4	65.45	PZE-104063220	63	117	62	1	0.27	-
607	ASTA	152502641	4	72.261	PZE-104078223	65	122	55	1	0.84	-
608	ASTA	153297437	4	73.086	PZE-104078977	62	117	55	9	0.42	-
609	ASTA	153297392	4	73.091	PZE-104078976	62	123	55	3	0.56	-
610	ASTA	154824549	4	73.716	PZE-104080425	64	125	53	1	1.26	-
611	ASTA	156412361	4	74.552	PZE-104082037	62	126	54	1	0.94	-
612	ASTA	159759353	4	77.787	PZE-104085482	59	123	58	3	0.16	-
613	ASTA	160488334	4	78.409	PZE-104086308	61	120	61	1	0.02	-
614	768PUB	161,101,970 - 161,102,256	4	80.102	PZA00492-26	60	126	54	3	0.9	-
615	ASTA	161106898	4	81.209	PZE-104086676	60	120	61	2	0.01	-
616	ASTA	165709495	4	84.2	PZE-104089746	60	119	63	1	0.14	-
617	ASTA	166905795	4	84.827	PZE-104090782	60	120	61	2	0.01	-
618	ASTA	167064438	4	85.243	PZE-104091297	61	120	62	0	0.05	-
619	768PUB	170547474	4	86.497	PZA01289-1	58	123	58	4	0.21	-
620	ASTA	172223347	4	88.73	PZE-104095850	57	122	60	4	0.18	-
621	ASTA	173335189	4	90.605	PZE-104096826	54	127	58	4	1.08	-
622	LGC	173207854	4	93.062	PZA01658_1	50	136	51	6	5.18	*
623	ASTA	177404155	4	100.589	PZE-104100716	55	131	56	1	1.66	-
624	ASTA	177673929	4	101.212	PZE-104101251	56	130	56	1	1.34	-
625	768PUB		4	101.625	PM01-0000319	55	130	57	1	1.37	-
626	ASTA	179648042	4	104.176	PZE-104103091	60	122	57	4	0.18	-
627	By Design	179488076	4	106.952	PZE04179457445	59	129	55	0	1.06	-
628	768PUB	180702654	4	107.784	PHM3637-14	62	117	52	12	0.9	-
629	ASTA		4	109.89	PHM14618-11	60	127	55	1	0.8	-
630	ASTA	182468257	4	113.086	PZE-104106157	57	129	56	1	1.07	-
631	ASTA	185128161	4	115.409	PZE-104108287	54	131	57	1	1.73	-
632	ASTA	185830285	4	116.239	PZE-104109208	53	131	58	1	1.86	-
633	ASTA	185939270	4	116.445	PZE-104109566	53	130	59	1	1.64	-
634	ASTA	186044330	4	116.445	PZE-104109689	54	130	59	0	1.4	-
635	LGC	185,450,834 - 185,887,475	4	116.651	PZA00941_2	53	128	59	3	1.37	-
636	ASTA	188180325	4	117.272	PZE-104112702	53	129	59	2	1.5	-
637	ASTA	188668078	4	117.272	PZE-104113283	53	128	59	3	1.37	-
638	768PUB	191945987	4	118.102	PHM4348.16	53	132	57	1	2.13	-
639	ASTA	190550884	4	118.102	PZE-104114790	53	131	58	1	1.86	-
640	ASTA	195061019	4	118.394	PZE-104118062	51	132	58	2	2.6	-
641	ASTA	195381467	4	118.394	PZE-104118502	52	130	58	3	1.97	-
642	ASTA	198948001	4	119.137	PZE-104121726	53	130	58	2	1.71	-
643	768PUB	198256878	4	119.137	PZA01810.2	54	130	58	1	1.47	-
644	768PUB	207440470	4	119.539	PZA01332.2	51	131	58	3	2.43	-
645	ASTA	203864646	4	119.551	PZE-104125843	52	133	58	0	2.47	-
646	ASTA	206542783	4	119.551	PZE-104127500	52	133	57	1	2.59	-
647	ASTA	204592258	4	119.554	PZE-104126472	52	132	58	1	2.3	-
648	768PUB	209975397	4	119.868	PHM4117-14	51	133	57	2	2.89	-
649	ASTA	209629793	4	120.17	PZE-104128990	54	131	56	2	1.86	-
650	ASTA	210564721	4	120.729	PZE-104129724	52	132	58	1	2.3	-
651	LGC	210865736	4	120.997	PZB01021_1	52	134	57	0	2.78	-
652	ASTA	211258292	4	121.222	PZE-104130234	53	132	56	2	2.27	-
653	ASTA	212856172	4	121.686	PZE-104131042	52	131	58	2	2.13	-
654	ASTA	216302049	4	121.926	PZE-104132510	50	133	58	2	3.12	-
655	ASTA	216777340	4	121.928	PZE-104132752	51	132	58	2	2.6	-
656	768PUB	215800497	4	121.934	pza00155-1	51	131	58	3	2.43	-
657	768PUB	221140072	4	122.324	PZA00878-2	50	130	57	6	2.65	-
658	768PUB		4	122.596	PZA00636-6	52	132	54	5	2.87	-
659	ASTA	220538498	4	122.64	PZE-104135287	51	132	58	2	2.6	-
660	ASTA	223494966	4	122.648	PZE-104136748	51	132	59	1	2.53	-
661	ASTA	225418065	4	123.478	PZE-104137814	50	130	60	3	2.5	-
662	ASTA	225608895	4	123.478	PZE-104138060	50	130	59	4	2.52	-
663	ASTA	227159452	4	123.684	PZE-104139257	50	128	61	4	2.22	-
664	ASTA	226844312	4	123.684	PZE-104138961	51	124	62	6	1.53	-
665	ASTA	229092250	4	124.407	PZE-104140188	49	128	63	3	2.7	-
666	ASTA	229719103	4	125.146	PZE-104140826	50	128	64	1	2.43	-
667	ASTA	235926616	4	134.498	PZE-104148101	58	117	60	8	0.04	-
668	ASTA	237017044	4	138.129	PZE-104149854	60	119	62	2	0.07	-
669		242313105	4	138.989	PZE04242313105	59	120	62	2	0.08	-
670	768PUB	238,491,010 - 238,491,289	4	142.297	PHM13084-4	59	111	62	11	0.51	-
671	ASTA	238842479	4	144.486	PZE-104153766	57	122	61	3	0.2	-
672	ASTA	239506720	4	145.769	PZE-104154700	59	120	64	0	0.24	-
673	ASTA	239766816	4	147.656	PZE-104155312	55	129	53	6	1.89	-
674	768PUB	239917859	4	148.277	PZA00682-2	56	126	59	2	0.58	-
675	ASTA	240170537	4	149.739	PZE-104156127	55	123	60	5	0.48	-
676	ASTA	240663506	4	152.201	PZE-104157101	58	127	56	2	0.73	-
677	By Design	241397903	4	153.31	S4_240842731	59	127	53	4	1.24	-
678	ASTA	241078004	4	153.32	PZE-104157783	59	127	55	2	0.83	-
679	By Design	241367031	4	153.953	S4_240811859	57	124	55	7	0.64	-
680	ASTA	1581349	5	0	PZE-105002105	70	119	51	3	3.03	-
681	ASTA	1610488	5	0	PZE-105002166	70	119	53	1	2.45	-
682	LGC	2708034	5	8.281	PZA01438_1	72	115	51	5	3.97	-
683	ASTA	3146267	5	9.361	PZE-105006245	71	122	49	1	4.02	-
684	ASTA	5105787	5	20.687	PZE-105011679	75	116	49	3	5.9	*
685	ASTA	5211999	5	21.921	PZE-105011922	75	111	51	6	5.81	*
686	ASTA		5	22.82	PHM14671.9	77	117	49	0	6.79	**
687	768PUB	5934158	5	25.849	PHM3762-18	76	111	53	3	5.76	*
688	ASTA	6577109	5	28.647	PZE-105015345	74	114	52	3	4.63	*
689	ASTA	6879904	5	29.27	PZE-105015810	73	113	53	4	4.05	-
690	768PUB	6867769	5	29.27	PZA02462.1	74	114	53	2	4.36	-
691	768PUB	7535138	5	31.596	PHM3137-17	75	110	55	3	5	*
692	LGC	7997038	5	33.692	PZB00094_1	76	107	57	3	5.82	*
693	768PUB	8007980	5	33.794	PHM533-46	76	108	57	2	5.59	*
694	ASTA	8343086	5	33.898	PZE-105018422	77	106	56	4	6.74	**
695	ASTA	9341783	5	34.104	PZE-105019535	76	110	57	0	5.15	*
696	768PUB	10,112,458 - 101,127,390	5	37.073	PHM9676-10	77	108	57	1	6.1	**
697	ASTA	10241039	5	37.724	PZE-105021600	80	97	55	11	11.61	****
698	ASTA	11961251	5	41.283	PZE-105024195	77	109	53	4	6.67	**
699	ASTA	12049484	5	41.283	PZE-105024349	77	110	53	3	6.47	**
700	ASTA	15332402	5	46.921	PZE-105029277	75	115	52	1	4.97	*
701	768PUB	15155074	5	47.055	PZA01327.1	75	113	52	3	5.22	*
702	ASTA	15202243	5	47.391	PZE-105028979	77	100	52	14	9.13	**
703	ASTA	15976063	5	49.151	PZE-105030407	74	115	52	2	4.52	-
704	ASTA	16116708	5	49.44	PZE-105030542	73	114	53	3	3.93	-
705	ASTA	16698274	5	50.603	PZE-105031065	74	114	54	1	4.12	-
706	ASTA	17708059	5	51.833	PZE-105032412	76	108	54	5	6.1	**
707	ASTA	19549465	5	53.873	PZE-105034376	74	112	51	6	5.18	*
708	ASTA	19077034	5	54.289	PZE-105033869	74	117	49	3	5.36	*
709	ASTA	19699312	5	54.596	PZE-105034671	74	116	45	8	7.2	**
710	By Design	19756125	5	54.963	S5_19734843	76	114	49	4	6.61	**
711	ASTA	20332712	5	55.211	PZE-105035340	74	117	49	3	5.36	*
712	ASTA	20784144	5	55.943	PZE-105035757	72	119	50	2	4.05	-
713	ASTA	22827086	5	57.341	PZE-105037986	68	119	50	6	2.74	-
714	ASTA	23894914	5	58.027	PZE-105038994	73	116	51	3	4.3	-
715	ASTA	29728048	5	59.887	PZE-105042539	73	113	52	5	4.31	-
716	768PUB	30770529	5	60.476	PZA00934.2	71	119	50	3	3.69	-
717	ASTA	32022433	5	60.742	PZE-105044556	72	120	49	2	4.39	-
718	768PUB	33305111	5	61.458	PHM4647-8	74	116	50	3	5.07	*
719	ASTA	39696766	5	62.197	PZE-105048851	71	117	54	1	2.65	-
720	768PUB	39215654	5	62.198	PHM12992-5	70	117	53	3	2.56	-
721	ASTA	41665810	5	63.343	PZE-105049623	70	120	49	4	3.69	-
722	ASTA	42686894	5	64.482	PZE-105050181	70	121	50	2	3.32	-
723	ASTA	43592242	5	64.482	PZE-105050668	70	118	50	5	3.38	-
724	ASTA	55578704	5	65.312	PZE-105057254	69	119	52	3	2.42	-
725	ASTA	56393973	5	65.312	PZE-105058012	69	120	50	4	3.03	-
726	ASTA	58172951	5	65.762	PZE-105059371	67	124	51	1	2.26	-
727	ASTA	58165925	5	66.228	PZE-105059355	66	126	49	2	2.9	-
728	768PUB	59,457,299 - 59,457,590	5	66.673	PHM2614-14	66	125	50	2	2.46	-
729	768PUB	63,257,898 - 63,258,193	5	67.137	PZA00472-2	67	119	46	11	3.96	-
730	By Design	65143058	5	67.588	PZE0564414127	66	125	52	0	1.81	-
731	768PUB	66460739	5	68.001	PHM4165-14	65	122	52	4	1.52	-
732	ASTA	68433853	5	68.207	PZE-105066316	63	124	53	3	1.1	-
733	768PUB	67,540,431 - 67,540,457	5	68.208	PHM13675-18	63	124	53	3	1.1	-
734	ASTA	71883721	5	68.546	PZE-105068703	63	123	53	4	1.04	-
735	768PUB	67,540,286 - 67,540,570	5	68.826	PHM13675-17	64	118	56	5	0.55	-
736	ASTA	71876450	5	68.826	PZE-105068653	64	119	56	4	0.54	-
737	768PUB	71876924	5	69.051	PHM5798.39	62	124	53	4	1.02	-
738	ASTA	83596588	5	70.848	PZE-105075673	60	123	56	4	0.34	-
739	ASTA	85777876	5	71.299	PZE-105076850	61	123	53	6	0.88	-
740	IDT (SSR)	84117596	5	71.745	umc2298	60	116	52	15	0.63	-
741	ASTA	87152210	5	72.367	PZE-105077553	59	127	50	7	2.06	-
742	IDT (SSR)	135817962	5	72.573	umc1591	61	126	54	2	0.91	-
743	ASTA	109607895	5	72.841	PZE-105086387	61	125	54	3	0.82	-
744	ASTA	103893503	5	73.608	PZE-105084817	62	120	59	2	0.08	-
745	ASTA	92840171	5	74.393	PZE-105080401	62	124	55	2	0.61	-
746	ASTA	101637213	5	74.644	PZE-105084195	64	123	54	2	0.93	-
747	ASTA	117141678	5	74.85	PZE-105088164	63	123	54	3	0.82	-
748	ASTA	141471077	5	75.056	PZE-105096172	62	125	53	3	1.09	-
749	ASTA	142175694	5	75.262	PZE-105096406	60	126	54	3	0.9	-
750	ASTA	127641818	5	75.667	PZE-105090726	60	125	54	4	0.81	-
751	ASTA	124001860	5	75.675	PZE-105089570	60	126	55	2	0.71	-
752	ASTA	130146098	5	75.675	PZE-105091717	61	124	50	8	1.75	-
753	ASTA	130860916	5	75.675	PZE-105091972	61	125	51	6	1.56	-
754	ASTA	150315205	5	76.715	PZE-105100373	60	127	54	2	1	-
755	ASTA	156881443	5	77.336	PZE-105103501	60	126	55	2	0.71	-
756	ASTA	159148743	5	77.736	PZE-105104698	60	124	55	4	0.55	-
757	ASTA	156178896	5	77.749	PZE-105103245	62	124	55	2	0.61	-
758	ASTA	158857658	5	77.749	PZE-105104504	62	122	55	4	0.51	-
759	ASTA	162874842	5	78.162	PZE-105106602	61	126	54	2	0.91	-
760	ASTA	163873555	5	78.162	PZE-105107214	61	124	56	2	0.41	-
761	ASTA	161319342	5	78.576	PZE-105106024	59	128	56	0	0.77	-
762	768PUB	161028058	5	80.039	PZA01796-1	59	121	63	0	0.14	-
763	ASTA	164571951	5	82.357	PZE-105107815	60	126	55	2	0.71	-
764	ASTA	166016700	5	85.543	PZE-105108884	54	133	52	4	3.08	-
765	ASTA	165781886	5	85.565	PZE-105108791	55	129	54	5	1.69	-
766	ASTA	167289312	5	85.996	PZE-105110003	56	132	53	2	2.27	-
767	ASTA	169501901	5	87.664	PZE-105112596	58	133	49	3	3.49	-
768	By Design	168492495	5	88.345	ae1_7	57	134	51	1	3.09	-
769	ASTA	170110879	5	90.478	PZE-105113193	57	135	50	1	3.64	-
770	ASTA	171092950	5	91.727	PZE-105114143	58	128	54	3	1.2	-
771	ASTA	172855146	5	94.139	PZE-105115809	57	132	52	2	2.4	-
772	ASTA	172785853	5	94.139	PZE-105115759	59	132	52	0	2.22	-
773	768PUB	176,170,449 - 176,170,149	5	96.627	PHM13696.11	60	129	51	3	2.03	-
774	ASTA	176636857	5	97.221	PZE-105119998	59	127	54	3	1.02	-
775	ASTA	177707387	5	97.799	PZE-105120851	57	128	53	5	1.5	-
776	ASTA	178136080	5	98.386	PZE-105121377	57	131	53	2	1.96	-
777	768PUB	179890528	5	99.712	PHM1899-157	59	127	55	2	0.83	-
778	ASTA	179056862	5	100.385	PZE-105122300	61	126	53	3	1.13	-
779	ASTA	180487916	5	102.451	PZE-105123692	62	129	51	1	2.06	-
780	ASTA	181635118	5	103.127	PZE-105124576	61	129	51	2	2.03	-
781	768PUB		5	103.135	PM01-00005DP	61	130	51	1	2.17	-
782	ASTA	182174855	5	103.75	PZE-105125004	61	130	51	1	2.17	-
783	By Design	182569708	5	103.75	Zm_67134_148	62	129	51	1	2.06	-
784	By Design	182518114	5	104.163	S5_182518114	62	129	51	1	2.06	-
785	ASTA	183535847	5	105.204	PZE-105126109	61	131	50	1	2.65	-
786	ASTA	184212056	5	106.035	PZE-105126747	64	131	48	0	3.59	-
787	ASTA	187622544	5	108.567	PZE-105130799	64	129	49	1	2.92	-
788	ASTA	187709975	5	108.567	PZE-105130825	64	129	50	0	2.54	-
789	768PUB	190739141	5	111.1	PHM6386-11	63	126	51	3	1.8	-
790	LGC	192901839	5	113.422	PZA02411_3	59	128	54	2	1.14	-
791	ASTA	195716777	5	114.252	PZE-105141007	61	128	52	2	1.61	-
792	768PUB	192,901,689 - 192,901,954	5	114.252	PHM1558-19	62	128	52	1	1.64	-
793	ASTA	194610391	5	114.253	PZE-105140112	62	127	53	1	1.26	-
794	ASTA	197039378	5	115.082	PZE-105142709	65	112	54	12	1.26	-
795	ASTA	198029139	5	116.121	PZE-105144035	62	125	56	0	0.5	-
796	768PUB	199430718	5	116.954	PZA03024-16	61	125	55	2	0.63	-
797	LGC	202049552	5	119.274	PZA01265_1	64	123	55	1	0.74	-
798	ASTA	202992426	5	120.735	PZE-105151649	62	121	60	0	0.04	-
799	ASTA	203371046	5	120.75	PZE-105152260	61	121	59	2	0.04	-
800	768PUB	204377241	5	121.148	PHM3512-186	60	112	60	11	0.28	-
801	ASTA	204479962	5	121.769	PZE-105154147	61	122	60	0	0.01	-
802	ASTA	204861882	5	124.736	PZE-105162987	63	118	61	1	0.18	-
803	ASTA	205432449	5	125.857	PZE-105156153	63	117	61	2	0.24	-
804	ASTA	206244923	5	127.878	PZE-105158393	62	106	60	15	1.16	-
805	ASTA	206517591	5	127.878	PZE-105158672	62	111	60	10	0.55	-
806	768PUB	207,432,898 - 207,433,018	5	131.214	PHM4349-3	56	125	60	2	0.47	-
807	LGC	208399072	5	135.751	PZA03167_5	54	129	59	1	1.26	-
808	768PUB	209731219	5	139.695	pza01680-3	56	133	53	1	2.45	-
809	768PUB	223209856	5	144.986	PHM5484-22	58	121	57	7	0.16	-
810	ASTA	212213505	5	149.459	PZE-105171747	57	129	51	6	2.16	-
811	LGC	212,731,435 - 212,731,555	5	150.974	PZA02390_1	57	126	58	2	0.51	-
812	By Design	213317641	5	155.618	PZE05212470411	61	128	53	1	1.34	-
813	LGC	205,440,973 - 217,012,402	5	171.522	PZA02769_1	58	134	50	1	3.32	-
814	768PUB	216,495,224 - 216,495,520	5	171.729	PHM2865-8	59	133	49	2	3.42	-
815	IDT (SSR)	498862	6	0	umc2309	62	123	57	1	0.27	-
816	ASTA	363913	6	2.318	PZE-106000115	61	127	50	5	2.09	-
817	ASTA	1712120	6	2.818	PZE-106000911	60	127	54	2	1	-
818	ASTA	2430159	6	4.197	PZE-106001418	63	114	49	17	1.75	-
819	ASTA	3872231	6	6.272	PZE-106002839	61	130	49	3	2.87	-
820	ASTA	7126864	6	7.831	PZE-106006003	60	134	48	1	3.98	-
821	ASTA	5303542	6	8.246	PZE-106004192	61	132	50	0	2.81	-
822	ASTA	6530603	6	8.868	PZE-106005121	60	130	52	1	1.87	-
823	768PUB	22,666,362 - 22,666,638	6	14.673	PZA00503-5	66	123	51	3	2.02	-
824	By Design	34441998	6	17.514	Zm_1436_ss229196980	65	121	55	2	0.83	-
825	ASTA	46937234	6	19.19	PZE-106019350	63	127	51	2	1.9	-
826	ASTA	56699252	6	19.19	PZE-106023350	63	127	50	3	2.22	-
827	ASTA	57905732	6	19.19	PZE-106023979	63	128	49	3	2.7	-
828	ASTA	89849399	6	28.183	PZE-106041140	71	113	56	3	2.69	-
829	ASTA	91314538	6	28.183	PZE-106041752	71	111	56	5	2.97	-
830	768PUB	93157907	6	29.222	PHM8909-12	74	108	60	1	4.41	-
831	ASTA	94087816	6	30.69	PZE-106044784	74	113	54	2	4.25	-
832	ASTA	95628935	6	31.563	PZE-106046103	74	109	56	4	4.56	-
833	ASTA	98256617	6	38.998	PZE-106049203	77	110	54	2	6.22	**
834	ASTA	102712665	6	40.094	PZE-106051765	77	109	55	2	6.21	**
835	ASTA	105133595	6	42.903	PZE-106054245	78	106	54	5	7.68	**
836	ASTA	109480315	6	48.89	PZE-106060535	77	111	52	3	6.56	**
837	ASTA	111839863	6	49.547	PZE-106057733	74	112	53	4	4.63	*
838	ASTA	112691819	6	53.585	PZE-106061708	73	118	51	1	4.15	-
839	ASTA	114752344	6	54.339	PZE-106063172	72	116	51	4	3.9	-
840	LGC	114066802	6	55.063	PZA01029_1	71	117	49	6	4.12	-
841	ASTA	116356247	6	55.898	PZE-106064449	70	121	48	4	4.09	-
842	ASTA	117781541	6	56.94	PZE-106065440	67	125	49	2	3.02	-
843	ASTA	117980020	6	56.94	PZE-106065562	67	126	47	3	3.93	-
844	ASTA	119049250	6	59.046	PZE-106066719	69	121	50	3	3.03	-
845	768PUB	120824044	6	59.871	PZA00571.2	70	121	48	4	4.09	-
846	ASTA	120829706	6	59.875	PZE-106067697	71	124	46	2	5.39	*
847	ASTA	123555159	6	62.237	PZE-106069685	70	109	51	13	3.77	-
848	768PUB	128,385,483 - 128,385,770	6	64.525	PHM12794-47	69	122	46	6	4.67	*
849	768PUB	129847209	6	65.576	pza01618-2	73	121	46	3	6.09	**
850	ASTA	130142560	6	66.077	PZE-106074545	73	120	46	4	6.1	**
851	ASTA	138084456	6	74.977	PZE-106080906	71	123	46	3	5.36	*
852	ASTA	138690133	6	75.39	PZE-106081362	71	124	47	1	4.91	*
853	768PUB	141105383	6	76.845	pza02478-7	72	122	46	3	5.7	*
854	ASTA	141476301	6	76.852	PZE-106084109	71	123	47	2	4.88	*
855	ASTA	142678045	6	77.623	PZE-106085267	73	121	44	5	7.13	**
856	768PUB	143887490	6	77.889	PZA02148.1	72	123	42	6	7.94	**
857	768PUB	146571023	6	78.927	pza02247-1	73	124	42	4	8.38	**
858	ASTA	147091195	6	78.927	PZE-106089546	73	125	41	4	9.08	**
859	ASTA	147404054	6	79.436	PZE-106090096	74	123	43	3	8.16	**
860	768PUB	147416603	6	79.961	PHM11985.27	72	120	47	4	5.23	*
861	ASTA	148620805	6	81.643	PZE-106092279	72	120	46	5	5.7	*
862	ASTA	149171327	6	82.853	PZE-106093277	78	116	46	3	8.8	**
863	ASTA	149552211	6	83.07	PZE-106093879	79	117	45	2	9.8	***
864	ASTA	150728969	6	83.506	PZE-106095393	77	118	44	4	9.15	**
865	ASTA	151085271	6	83.919	PZE-106096901	78	115	46	4	8.91	**
866	ASTA	151773199	6	83.919	PZE-106097864	81	115	45	2	11.26	****
867	ASTA	152379638	6	83.919	PZE-106098493	81	114	45	3	11.4	****
868	ASTA	151978362	6	84.125	PZE-106097959	81	114	45	3	11.4	****
869	768PUB	153,166,964 - 153,167,084	6	84.859	PHM15251-5	81	113	45	4	11.55	****
870	768PUB	153,166,798 - 153,167,067	6	84.866	PHM15251.3	81	109	45	8	12.26	****
871	LGC	154540055	6	85.785	PZA01672_1	82	115	46	0	11.36	****
872	ASTA	155300018	6	87.516	PZE-106103556	81	108	48	6	11.05	****
873	ASTA	155366779	6	88.499	PZE-106103612	77	107	50	9	7.94	**
874	768PUB	155588945	6	89.229	PZA01462.1	80	105	50	8	10.32	***
875	768PUB	155,433,238 - 155,432,944	6	89.297	PHM4662-153	81	107	48	7	11.28	****
876	ASTA	156412285	6	90.062	PZE-106105805	81	110	48	4	10.62	****
877	ASTA	155849466	6	90.298	PZE-106105143	80	106	51	6	9.73	***
878	768PUB	156787344	6	91.285	PHM5794-13	82	109	49	3	11.09	****
879	ASTA	157520147	6	93.182	PZE-106108125	86	106	48	3	15.3	******
880	ASTA		6	93.418	PHM597-18	84	107	49	3	13.02	****
881	ASTA	158562059	6	95.803	PZE-106109825	84	110	47	2	13.19	****
882	ASTA	158565207	6	96.02	PZE-106109857	86	109	47	1	14.95	*****
883	ASTA	159211004	6	97.74	PZE-106110981	84	114	43	2	14.65	*****
884	ASTA	160810226	6	102.377	PZE-106114436	82	116	42	3	13.6	****
885	ASTA	162162369	6	104.4	PZE-106116788	80	113	43	7	12.03	****
886	ASTA	162484813	6	106.199	PZE-106118195	78	118	42	5	10.91	****
887	ASTA	162840216	6	106.665	PZE-106119113	78	115	44	6	9.96	***
888	LGC	163295809	6	110.729	PZA00889_2	74	124	44	1	7.59	**
889	ASTA	163599813	6	112.676	PZE-106121133	78	120	42	3	10.8	****
890	ASTA	163865368	6	113.094	PZE-106121498	78	116	45	4	9.32	***
891	768PUB	164183808	6	116.361	pza02688-2	75	120	45	3	7.5	**
892	LGC	165091557	6	120.555	PHM2658_129	78	117	46	2	8.7	**
893	ASTA	165447594	6	121.598	PZE-106125698	81	111	49	2	10	***
894	ASTA	165745354	6	122.011	PZE-106126667	80	113	48	2	9.43	***
895	LGC	166792934	6	125.687	PZA00910_1	78	107	49	9	8.9	**
896	768PUB	167,219,054 - 167,219,349	6	127.777	PHM5529.4	78	111	51	3	7.43	**
897	768PUB	167234441	6	128.003	PHM3466.69	75	113	51	4	5.53	*
898	ASTA	167902792	6	129.852	PZE-106131184	71	109	52	11	3.96	-
899	IDT (SSR)	168974988	6	131.376	umc1127	76	113	51	3	6.02	**
900	ASTA	169033478	6	131.789	PZE-106129968	73	110	52	8	4.71	*
901	LGC		6	131.789	PZA02815_25	77	112	52	2	6.39	**
902	IDT (SSR)	3022326	7	0	bnlg1642	44	133	60	6	5.71	*
903	ASTA	2464670	7	4.64	PZE-107003187	51	131	58	3	2.43	-
904	IDT (SSR)	3084784	7	9.664	umc1426	48	133	62	0	3.79	-
905	ASTA	3674203	7	11.14	PZE-107005454	50	127	65	1	2.45	-
906	ASTA	4069802	7	12.189	PZE-107005832	51	122	67	3	2.2	-
907	ASTA	5521419	7	20.549	PZE-107008696	49	126	65	3	2.73	-
908	768PUB	6070366	7	22.058	PHM3078-12	46	128	66	3	4.4	-
909	LGC	6545195	7	23.582	PZA01909_1	45	120	62	16	3.29	-
910	768PUB	6545376	7	23.582	PHM4135-15	48	126	67	2	3.5	-
911	ASTA	8935169	7	26.337	PZE-107012310	47	126	64	6	3.39	-
912	768PUB	9,547,974 - 9,548,086	7	29.309	PZA01613-1	44	125	67	7	5.31	*
913	ASTA	9536290	7	29.309	PZE-107013193	44	129	67	3	5.76	*
914	ASTA	9543590	7	29.309	PZE-107013199	47	126	67	3	3.93	-
915	By Design	10657419	7	31.197	Zm_84867_ss229247801	47	125	68	3	4.09	-
916	ASTA	11341091	7	31.856	PZE-107014666	45	126	69	3	5.4	*
917	ASTA		7	32.731	PZE-107015950	44	128	68	3	5.87	*
918	IDT (SSR)	10764363	7	33.895	umc2325	43	130	63	7	5.83	*
919	ASTA	14925428	7	37.498	PZE-107017393	45	129	66	3	5.02	*
920	ASTA	16288006	7	37.941	PZE-107018459	47	129	65	2	3.89	-
921	ASTA	20213157	7	39.832	PZE-107020997	49	125	67	2	3.02	-
922	ASTA	21199959	7	40.368	PZE-107021672	48	125	69	1	3.91	-
923	ASTA	22693913	7	41.332	PZE-107022645	47	125	69	2	4.35	-
924	ASTA	27328334	7	41.745	PZE-107025115	46	126	70	1	5.17	*
925	ASTA	24730145	7	41.745	PZE-107023669	47	124	70	2	4.59	-
926	ASTA	26169121	7	41.952	PZE-107024408	46	126	70	1	5.17	*
927	ASTA	29554999	7	42.573	PZE-107026387	47	126	68	2	4.16	-
928	ASTA	28602485	7	42.986	PZE-107025858	46	126	71	0	5.48	*
929	ASTA	32286067	7	43.192	PZE-107027488	46	126	70	1	5.17	*
930	ASTA	40587098	7	44.022	PZE-107031153	46	127	68	2	4.72	*
931	ASTA	40594412	7	44.022	PZE-107031164	48	126	68	1	3.72	-
932	ASTA	48558148	7	44.228	PZE-107034752	49	126	68	0	3.3	-
933	IDT (SSR)	49543538	7	44.849	umc1666	51	125	67	0	2.31	-
934	ASTA	49750049	7	45.407	PZE-107035082	49	125	67	2	3.02	-
935	768PUB	41747129	7	45.47	PZA00084.2	49	125	68	1	3.25	-
936	ASTA	44303662	7	45.47	PZE-107032930	49	126	67	1	3.09	-
937	ASTA	86976819	7	45.676	PZE-107043997	47	127	68	1	4.24	-
938	ASTA	82344623	7	45.676	PZE-107041889	48	127	64	4	3.08	-
939	ASTA	86944020	7	45.758	PZE-107043973	47	126	68	2	4.16	-
940	ASTA	64152104	7	45.882	PZE-107048581	49	125	68	1	3.25	-
941	ASTA	94230105	7	46.088	PZE-107046004	49	126	64	4	2.59	-
942	ASTA	95806562	7	46.088	PZE-107046954	49	123	67	4	2.92	-
943	LGC	103535856	7	46.501	PZA01933_3	48	126	65	4	3.13	-
944	ASTA	101001432	7	46.501	PZE-107051526	48	127	68	0	3.79	-
945	ASTA	108872112	7	47.963	PZE-107056722	48	130	64	1	3.45	-
946	ASTA	116103506	7	48.584	PZE-107060446	47	129	63	4	3.65	-
947	ASTA	117877913	7	49.205	PZE-107061634	46	131	65	1	4.64	*
948	ASTA	118345812	7	49.411	PZE-107062095	46	133	63	1	4.77	*
949	IDT (SSR)	118007174	7	50.241	umc1393	46	134	62	1	4.91	*
950	ASTA	122734325	7	51.491	PZE-107065748	47	133	61	2	4.22	-
951	ASTA	122732387	7	51.491	PZE-107065747	49	133	59	2	3.42	-
952	IDT (SSR)	128981461	7	54.02	bnlg1164	43	124	63	13	4.89	*
953	ASTA	125234357	7	56.08	PZE-107068449	48	134	57	4	4.2	-
954	IDT (SSR)	129109884	7	56.314	bnlg657	47	129	57	10	3.54	-
955	ASTA	128680536	7	59.633	PZE-107072354	44	136	62	1	6.4	**
956	ASTA	129896750	7	59.866	PZE-107073339	44	134	62	3	5.97	*
957	ASTA	130816991	7	60.886	PZE-107074954	45	134	62	2	5.42	*
958	ASTA	130393499	7	61.33	PZE-107074506	45	134	62	2	5.42	*
959	LGC	130352569	7	62.198	PZA02352_1	44	134	62	3	5.97	*
960	ASTA	132222743	7	64.909	PZE-107077092	46	115	67	15	3.89	-
961	ASTA	134880687	7	69.706	PZE-107079979	53	121	66	3	1.42	-
962	ASTA	138499631	7	72.465	PZE-107083628	54	113	66	10	1.45	-
963	ASTA	141616264	7	73.645	PZE-107086015	52	121	67	3	1.89	-
964	768PUB	144166083	7	76.561	PZA00405-7	52	125	64	2	1.53	-
965	ASTA	146639825	7	79.543	PZE-107091745	54	121	64	4	0.87	-
966	768PUB	148887302	7	81.555	PZA02722-1	54	127	61	1	1	-
967	ASTA	148888220	7	81.555	PZE-107094078	54	123	62	4	0.74	-
968	ASTA	151568608	7	82.595	PZE-107095879	53	126	62	2	1.17	-
969	ASTA	153291091	7	84.271	PZE-107098089	53	123	65	2	1.3	-
970	ASTA	153882012	7	84.477	PZE-107098889	53	125	64	1	1.26	-
971	ASTA	155599977	7	85.733	PZE-107101066	55	122	62	4	0.51	-
972	ASTA	155874459	7	85.733	PZE-107101793	55	122	62	4	0.51	-
973	ASTA	156925923	7	89.36	PZE-107103880	53	122	64	4	1.12	-
974	ASTA	157479009	7	89.36	PZE-107104709	53	125	63	2	1.17	-
975	768PUB	158729820	7	92.754	PHM112-8	53	108	64	18	1.44	-
976	ASTA	158338308	7	92.971	PZE-107106472	52	127	64	0	1.68	-
977	LGC	158718240	7	93.384	PZA02260_2	50	129	63	1	2.45	-
978	ASTA	158991659	7	94.636	PZE-107107154	51	128	63	1	2	-
979	768PUB	161,698,194 - 161,698,312	7	99.617	PHM1912-23	53	122	67	1	1.64	-
980	768PUB	161,698,087 - 161,698,377	7	99.617	PHM1912-20	54	120	67	2	1.41	-
981	ASTA	161659724	7	99.617	PZE-107111553	54	121	67	1	1.4	-
982	ASTA	161703194	7	99.617	PZE-107111593	54	121	67	1	1.4	-
983	ASTA	161989411	7	100.447	PZE-107112738	54	122	67	0	1.4	-
984	ASTA	162075583	7	101.277	PZE-107113180	55	120	68	0	1.43	-
985	ASTA	162195407	7	102.739	PZE-107113482	56	96	74	17	7.98	**
986	ASTA	162299166	7	104.202	PZE-107113712	54	117	70	2	2.33	-
987	ASTA	163270656	7	105.032	PZE-107115559	53	117	71	2	2.89	-
988	ASTA	164109038	7	106.493	PZE-107116741	52	121	70	0	2.67	-
989	ASTA	165498135	7	108.169	PZE-107119234	53	119	71	0	2.77	-
990	ASTA	166595768	7	110.711	PZE-107121188	54	114	72	3	3.3	-
991	768PUB	167977361	7	113.907	PHM10225-15	55	117	70	1	2.12	-
992	ASTA	168449957	7	115.922	PZE-107125313	57	117	66	3	0.82	-
993	ASTA	169135278	7	117.264	PZE-107126409	52	122	67	2	1.9	-
994	ASTA	170699695	7	118.169	PZE-107128722	53	122	64	4	1.12	-
995	768PUB	171,273,794 - 171,274,089	7	119.989	PZA00695-1	55	127	61	0	0.79	-
996	LGC	169,049,744 - 170,136,454	7	121.029	PZB00605_1	56	126	60	1	0.55	-
997	ASTA	171785716	7	121.651	PZE-107130520	54	127	60	2	1	-
998	ASTA	172165350	7	123.539	PZE-107131073	55	130	58	0	1.26	-
999	ASTA	172199234	7	123.539	PZE-107131127	55	130	56	2	1.51	-
1000	768PUB		7	126.003	PM01-00002W4	56	127	58	2	0.73	-
1001	ASTA	173222605	7	127.181	PZE-107133704	58	125	58	2	0.34	-
1002	IDT (SSR)	170247287	7	129.645	umc2222	61	121	57	4	0.17	-
1003	ASTA	173523769	7	130.254	PZE-107134586	61	114	56	12	0.26	-
1004	ASTA	173531926	7	130.271	PZE-107134626	57	126	56	4	0.72	-
1005	ASTA		7	131.804	PZE-107135626	61	122	55	5	0.45	-
1006	IDT (SSR)	170246381	7	134.745	umc1760	63	121	57	2	0.3	-
1007	768PUB	174,881,413 - 174,881,709	7	138.464	PZA02850-18	62	126	54	1	0.94	-
1008	768PUB	175,243,153 - 175,243,443	7	140.3	PHM5232-11	62	127	53	1	1.26	-
1009	LGC	175243183	7	141.439	PZA01044_1	61	126	51	5	1.66	-
1010	LGC	169077	8	0	PZA02388_1	55	130	58	0	1.26	-
1011	ASTA	935340	8	1.376	PZE-108001108	55	126	59	3	0.73	-
1012	ASTA	1640355	8	2.086	PZE-108001699	56	125	58	4	0.54	-
1013	ASTA	2289309	8	4.864	PZE-108002184	59	129	53	2	1.5	-
1014	ASTA	2792394	8	10.14	PZE-108002634	57	128	53	5	1.5	-
1015	ASTA	3165923	8	10.58	PZE-108002941	55	133	53	2	2.63	-
1016	ASTA	3891006	8	14.065	PZE-108003848	53	136	51	3	4.3	-
1017	ASTA	4285891	8	14.518	PZE-108004274	54	135	52	2	3.52	-
1018	ASTA	4432556	8	17.354	PZE-108004388	55	135	52	1	3.31	-
1019	ASTA	4959265	8	18.184	PZE-108004841	54	130	54	5	2.03	-
1020	768PUB	5,162,060 - 5,162,351	8	18.39	PHM4512-38	53	136	54	0	3.47	-
1021	ASTA	5605717	8	19.82	PZE-108005561	52	137	53	1	4.24	-
1022	LGC	5679328	8	20.057	PZA00368_1	52	136	51	4	4.56	-
1023	LGC	6023745	8	20.891	PZA00058_1	53	138	52	0	4.49	-
1024	ASTA	6810950	8	21.311	PZE-108006634	52	135	51	5	4.31	-
1025	ASTA	8017175	8	24.565	PZE-108007795	51	126	51	15	2.53	-
1026	768PUB	8,120,498 - 8,120,788	8	25.405	PHM2487-6	50	143	49	1	8.01	**
1027	ASTA	8357499	8	27.1	PZE-108008327	56	135	51	1	3.45	-
1028	ASTA	9876160	8	29.688	PZE-108009251	55	137	50	1	4.44	-
1029	ASTA	9927016	8	30.309	PZE-108009325	57	136	50	0	3.86	-
1030	ASTA	10863192	8	32.601	PZE-108010327	51	142	46	4	8.68	**
1031	LGC	11487844	8	33.964	PZA03178_1	50	141	47	5	8.21	**
1032	ASTA	11572352	8	35.248	PZE-108011044	47	144	48	4	10.05	***
1033	ASTA	12360281	8	37.527	PZE-108012113	50	142	48	3	8.1	**
1034	ASTA	12849912	8	39.281	PZE-108012482	50	144	48	1	8.78	**
1035	ASTA	13635941	8	43.028	PZE-108013775	49	141	52	1	6.69	**
1036	768PUB	14780510	8	44.282	PZA02955.3	49	140	50	4	7.04	**
1037	ASTA	15987527	8	45.592	PZE-108016244	46	142	51	4	8.68	**
1038	ASTA	15987499	8	45.594	PZE-108016243	46	144	51	2	9.37	***
1039	ASTA	16748424	8	47.376	PZE-108016906	47	144	50	2	9.24	***
1040	ASTA	17385381	8	48.403	PZE-108018250	46	141	50	6	8.68	**
1041	768PUB	18,228,485 - 18,228,781	8	48.645	PHM5158-13	47	143	49	4	9.28	***
1042	ASTA	18205703	8	48.954	PZE-108019544	45	147	50	1	11.38	****
1043	LGC		8	49.725	PZA02528_1	44	147	52	0	11.23	****
1044	ASTA	18608339	8	51.841	PZE-108018815	46	146	48	3	11.3	****
1045	ASTA		8	52.3	PZE-108018447	47	148	47	1	12.05	****
1046	ASTA	20314519	8	52.943	PZE-108021296	47	145	48	3	10.42	***
1047	ASTA	20702413	8	54.654	PZE-108021868	47	145	50	1	9.6	***
1048	ASTA	22801877	8	57.066	PZE-108024116	54	134	51	4	3.59	-
1049	768PUB	23,963,964 - 23,964,257	8	57.689	PHM2350-14	54	137	51	1	4.31	-
1050	ASTA	24351816	8	58.102	PZE-108025613	52	134	50	7	4.37	-
1051	ASTA	25355951	8	58.65	PZE-108026312	50	135	52	6	4.63	*
1052	ASTA	26757485	8	58.93	PZE-108028915	56	132	52	3	2.53	-
1053	ASTA	70907188	8	61.032	PZE-108042969	55	131	57	0	1.52	-
1054	ASTA	71323323	8	62.282	PZE-108043142	54	137	51	1	4.31	-
1055	ASTA	32756897	8	62.488	PZE-108029480	56	135	51	1	3.45	-
1056	ASTA	40962073	8	62.488	PZE-108033821	56	136	51	0	3.67	-
1057	ASTA	60822982	8	62.488	PZE-108037876	56	135	51	1	3.45	-
1058	ASTA	65496608	8	62.694	PZE-108040407	53	137	51	2	4.55	-
1059	ASTA	33840633	8	62.694	PZE-108030174	54	137	51	1	4.31	-
1060	ASTA	53377969	8	62.694	PZE-108035879	55	137	51	0	4.09	-
1061	LGC	55724548	8	63.734	PZA01209_1	50	141	51	1	6.62	**
1062	ASTA	70800091	8	64.485	PZE-108042901	53	138	51	1	4.81	*
1063	768PUB	74,049,727 - 74,049,427	8	65.024	PHM5395-34	53	137	51	2	4.55	-
1064	768PUB	74049795	8	65.027	PZA01470-1	52	138	51	2	5.09	*
1065	LGC	91503107	8	66.649	PZA02683_1	51	138	48	6	6.49	**
1066	ASTA	84309403	8	67.895	PZE-108049315	51	140	50	2	6.32	**
1067	ASTA	84619368	8	67.899	PZE-108049414	53	139	50	1	5.43	*
1068	ASTA	87548231	8	67.899	PZE-108050483	53	140	50	0	5.71	*
1069	ASTA	80589739	8	68.312	PZE-108048129	54	138	51	0	4.56	-
1070	ASTA	82487730	8	68.581	PZE-108048734	54	133	50	6	3.68	-
1071	ASTA	92445685	8	69.139	PZE-108052389	56	132	51	4	2.82	-
1072	ASTA	92730672	8	69.142	PZE-108052599	55	133	51	4	3.18	-
1073	ASTA	95226988	8	69.552	PZE-108053677	53	136	52	2	4	-
1074	ASTA	95257165	8	69.553	PZE-108053763	55	135	52	1	3.31	-
1075	ASTA	100461210	8	70.382	PZE-108056042	56	133	42	12	7	**
1076	ASTA	95465523	8	70.689	PZE-108053922	54	137	50	2	4.65	*
1077	768PUB	100690185	8	71.626	PZA00908-2	55	136	52	0	3.53	-
1078	ASTA	100778403	8	72.04	PZE-108056415	56	135	51	1	3.45	-
1079	ASTA	102058087	8	72.453	PZE-108057442	55	136	52	0	3.53	-
1080	ASTA	106200928	8	73.492	PZE-108059579	54	137	52	0	3.99	-
1081	ASTA	106271146	8	73.492	PZE-108059741	54	136	52	1	3.75	-
1082	ASTA	109708767	8	74.113	PZE-108061507	55	134	54	0	2.58	-
1083	ASTA	110044195	8	74.32	PZE-108061742	52	133	54	4	3.08	-
1084	ASTA	113298657	8	75.359	PZE-108063662	51	134	56	2	3.23	-
1085	ASTA	115951348	8	75.565	PZE-108065108	52	135	56	0	3.13	-
1086	ASTA	117716162	8	76.187	PZE-108066557	51	134	58	0	2.98	-
1087	ASTA	121414788	8	76.6	PZE-108069336	51	134	58	0	2.98	-
1088	LGC	127022910	8	78.274	PZA00118_5	49	132	56	6	3.49	-
1089	ASTA	124839124	8	79.103	PZE-108072369	51	134	58	0	2.98	-
1090	ASTA	127495811	8	79.103	PZE-108073336	51	124	58	10	1.39	-
1091	ASTA	128081516	8	79.31	PZE-108073574	52	130	58	3	1.97	-
1092	ASTA	130281471	8	79.31	PZE-108075125	52	133	58	0	2.47	-
1093	ASTA	132687514	8	79.723	PZE-108077475	50	135	58	0	3.53	-
1094	ASTA	134259136	8	80.136	PZE-108078790	50	135	58	0	3.53	-
1095	LGC	134991630	8	80.549	PZA00770_1	48	133	57	5	3.97	-
1096	ASTA	134024917	8	80.963	PZE-108078660	49	133	58	3	3.49	-
1097	ASTA	137293335	8	80.963	PZE-108081069	50	134	58	1	3.32	-
1098	ASTA	137758806	8	81.169	PZE-108081298	50	134	59	0	3.24	-
1099	ASTA	139998558	8	81.79	PZE-108083595	51	130	61	1	2.17	-
1100	ASTA	141012354	8	81.996	PZE-108084307	50	132	61	0	2.81	-
1101	ASTA	142543156	8	82.826	PZE-108085971	51	126	62	4	1.72	-
1102	ASTA	143909914	8	83.447	PZE-108086766	49	131	63	0	3.1	-
1103	ASTA	145018502	8	84.277	PZE-108088067	50	131	62	0	2.67	-
1104	ASTA	146373294	8	85.738	PZE-108089827	47	132	64	0	4.19	-
1105	ASTA	149140559	8	86.133	PZE-108092516	47	133	62	1	4.24	-
1106	ASTA	149423569	8	86.151	PZE-108092820	47	134	62	0	4.42	-
1107	ASTA	151200391	8	89.429	PZE-108095270	41	138	63	1	8.78	**
1108	ASTA	153247707	8	91.441	PZE-108097802	42	139	61	1	8.34	**
1109	768PUB	153,401,884 - 153,402,169	8	91.441	PHM4677-11	43	134	61	5	6.5	**
1110	ASTA	153688427	8	91.441	PZE-108098097	43	138	61	1	7.45	**
1111	768PUB	155,021,666 - 155,021,404	8	92.901	PZA00334-2	45	138	59	1	6.4	**
1112	ASTA	155192971	8	92.902	PZE-108099484	44	132	60	7	5.49	*
1113	768PUB	156264004	8	93.41	PHM15278-6	40	138	61	4	9.42	***
1114	768PUB	156,312,225 - 156,312,504	8	94.023	PZA00177-4	45	129	60	9	4.38	-
1115	ASTA	156835124	8	94.977	PZE-108101407	42	142	59	0	9.3	***
1116	ASTA	158526244	8	96.565	PZE-108103185	42	139	60	2	8.37	**
1117	ASTA	158637258	8	97.695	PZE-108103524	45	132	61	5	4.99	*
1118	LGC		8	103.143	PZB00811_1	50	136	56	1	4.02	-
1119	ASTA	161441718	8	103.38	PZE-108108491	49	137	55	2	4.82	*
1120	ASTA	162399619	8	104.835	PZE-108110041	48	140	53	2	6.52	**
1121	768PUB	163926228	8	107.624	pza02746-2	52	135	53	3	3.76	-
1122	ASTA	164832137	8	109.328	PZE-108114666	56	131	55	1	1.66	-
1123	LGC	164961588	8	110.163	PZA00020_5	58	129	52	4	1.81	-
1124	ASTA	165539267	8	113.117	PZE-108116182	54	128	58	3	1.2	-
1125	ASTA	166176285	8	114.447	PZE-108117321	58	124	60	1	0.18	-
1126	ASTA	167573906	8	120.505	PZE-108120155	61	116	65	1	0.55	-
1127	ASTA	168742973	8	124.198	PZE-108122325	67	108	67	1	2.79	-
1128	ASTA	168873296	8	124.819	PZE-108122589	66	105	67	5	3.3	-
1129	ASTA	169082983	8	124.819	PZE-108123038	66	108	67	2	2.6	-
1130	ASTA	169413054	8	125.651	PZE-108123565	70	106	67	0	4.03	-
1131	ASTA	169913186	8	129.984	PZE-108125652	71	106	60	6	3.66	-
1132	ASTA	170569687	8	131.028	PZE-108126856	70	111	62	0	2.34	-
1133	ASTA	171092876	8	132.335	PZE-108128026	71	106	60	6	3.66	-
1134	768PUB	171446937	8	136.547	PHM14104-23	67	115	56	5	1.29	-
1135	768PUB		8	137.209	PM01-000053E	72	111	57	3	3.22	-
1136	768PUB	171,776,968 - 171,776,711	8	137.655	PHM3312-23	73	113	56	1	3.45	-
1137	ASTA	173342575	8	146.132	PZE-108133641	73	115	52	3	4.09	-
1138	ASTA	173346258	8	146.132	PZE-108133621	75	116	52	0	4.85	*
1139	ASTA	173993687	8	149.099	PZE-108135132	73	112	51	7	4.71	*
1140	ASTA	174000891	8	149.099	PZE-108135143	73	118	52	0	3.83	-
1141	ASTA	173834469	8	150.149	PZE-108134712	77	113	51	2	6.54	**
1142	ASTA	175287546	8	150.774	PZE-108135936	75	113	50	5	5.86	*
1143	IDT (SSR)	174236946	8	151.211	bnlg1131	73	104	53	13	5.58	*
1144	IDT (SSR)	4301006	9	0	bnlg1272a	52	119	49	23	1.55	-
1145	ASTA	1873926	9	2.02	PZE-109001327	60	128	54	1	1.11	-
1146	ASTA	2485561	9	3.141	PZE-109002005	58	130	54	1	1.47	-
1147	ASTA	3654090	9	4.183	PZE-109003047	56	132	54	1	2.03	-
1148	ASTA	4290807	9	4.806	PZE-109003658	57	133	52	1	2.59	-
1149	IDT (SSR)	4382875	9	5.44	umc1040	58	125	49	11	2.09	-
1150	ASTA	6006709	9	8.454	PZE-109005409	60	129	53	1	1.46	-
1151	ASTA	11139254	9	17.128	PZE-109010021	59	123	57	4	0.24	-
1152	ASTA	10811210	9	17.34	PZE-109009763	57	125	56	5	0.61	-
1153	768PUB		9	18.481	PM01-000040A	57	128	54	4	1.28	-
1154	IDT (SSR)	11496030	9	20.508	phi028	64	112	59	8	0.73	-
1155	ASTA	12726027	9	25.878	PZE-109012061	56	127	55	5	1.08	-
1156	ASTA	12987799	9	26.589	PZE-109012535	59	126	56	2	0.58	-
1157	ASTA	13457032	9	27.314	PZE-109013000	55	128	57	3	1.1	-
1158	768PUB	13,778,864 - 13,778,958	9	28.04	PZA02344.1	56	119	61	7	0.23	-
1159	ASTA	13670141	9	28.254	PZE-109013421	55	127	59	2	0.83	-
1160	ASTA	18395197	9	36.43	PZE-109018101	62	125	55	1	0.67	-
1161	ASTA	18886601	9	37.29	PZE-109018465	59	129	54	1	1.26	-
1162	LGC	19400994	9	38.359	PZA03058_22	55	133	54	1	2.39	-
1163	ASTA	19666620	9	39.191	PZE-109019364	57	132	52	2	2.4	-
1164	ASTA	21887242	9	43.316	PZE-109021584	53	128	58	4	1.42	-
1165	ASTA	21933539	9	43.526	PZE-109021681	54	132	56	1	2.03	-
1166	ASTA	25833120	9	48.331	PZE-109025646	52	136	53	2	4	-
1167	ASTA	26957451	9	50.23	PZE-109026940	49	135	58	1	3.91	-
1168	768PUB	30,087,720 - 30,088,002	9	50.451	PHM229.15	48	133	58	4	3.89	-
1169	ASTA	27108864	9	50.455	PZE-109027147	49	133	59	2	3.42	-
1170	ASTA	40399655	9	51.324	PZE-109032898	49	130	62	2	2.9	-
1171	ASTA	41588126	9	52.174	PZE-109033093	52	130	59	2	1.9	-
1172	ASTA	43845139	9	52.187	PZE-109034150	51	130	58	4	2.26	-
1173	ASTA	38156085	9	52.212	PZE-109031737	52	132	59	0	2.22	-
1174	ASTA	63268025	9	52.625	PZE-109047415	53	128	60	2	1.34	-
1175	ASTA	47395280	9	52.653	PZE-109035663	50	130	60	3	2.5	-
1176	ASTA	45381776	9	52.671	PZE-109034832	52	128	60	3	1.6	-
1177	LGC		9	52.933	PZB00014_1	51	130	59	3	2.2	-
1178	ASTA	66533772	9	53.189	PZE-109041733	51	130	59	3	2.2	-
1179	ASTA	64696495	9	53.256	PZE-109040944	53	130	59	1	1.64	-
1180	ASTA	48073734	9	53.259	PZE-109035852	53	129	57	4	1.64	-
1181	ASTA	67914859	9	53.586	PZE-109041967	48	129	59	7	3.08	-
1182	ASTA	74481770	9	54.487	PZE-109043519	51	128	61	3	1.9	-
1183	ASTA	56358591	9	54.809	PZE-109037850	52	129	61	1	1.73	-
1184	ASTA	56869128	9	55.107	PZE-109038023	53	129	60	1	1.46	-
1185	ASTA	75597482	9	55.52	PZE-109044048	53	128	60	2	1.34	-
1186	LGC	87869957	9	56.515	PZB00761_1	53	121	61	8	0.75	-
1187	ASTA	85125692	9	56.821	PZE-109048473	53	123	62	5	0.95	-
1188	ASTA	84352543	9	56.971	PZE-109048180	54	110	66	13	1.69	-
1189	ASTA	88296618	9	57.569	PZE-109050180	53	121	64	5	1.08	-
1190	ASTA	93081164	9	58.496	PZE-109053325	54	121	65	3	1.02	-
1191	LGC	91975945	9	59.252	PZA01062_1	54	126	62	1	0.94	-
1192	ASTA	96744485	9	60.292	PZE-109055139	56	120	64	3	0.53	-
1193	ASTA	98895608	9	60.498	PZE-109056967	55	119	65	4	0.84	-
1194	ASTA	98546322	9	60.498	PZE-109056744	56	121	65	1	0.67	-
1195	ASTA	100373569	9	61.119	PZE-109058129	54	120	65	4	1.02	-
1196	ASTA	100588246	9	61.119	PZE-109058305	56	119	64	4	0.54	-
1197	ASTA	103793142	9	63.006	PZE-109061001	57	119	65	2	0.57	-
1198	ASTA	105442076	9	63.628	PZE-109062229	57	121	61	4	0.17	-
1199	ASTA	108043968	9	65.948	PZE-109064888	58	121	61	3	0.09	-
1200	ASTA	108482593	9	66.987	PZE-109065712	57	123	59	4	0.24	-
1201	LGC	110678211	9	68.451	PZA00152_1	62	123	55	3	0.56	-
1202	ASTA	111482604	9	70.764	PZE-109067632	64	123	54	2	0.93	-
1203	LGC		9	70.992	PZA03470_1	63	123	55	2	0.63	-
1204	ASTA	113815153	9	70.992	PZE-109069697	63	124	53	3	1.1	-
1205	ASTA	114183289	9	70.992	PZE-109069913	63	124	55	1	0.68	-
1206	ASTA	116377711	9	72.251	PZE-109071675	64	122	54	3	0.9	-
1207	ASTA	120879782	9	73.943	PZE-109074670	65	122	56	0	0.67	-
1208	ASTA	128912970	9	83.68	PZE-109080626	74	111	57	1	4.04	-
1209	ASTA	130785153	9	84.724	PZE-109082015	73	112	57	1	3.45	-
1210	ASTA	132095722	9	84.979	PZE-109083108	72	113	56	2	3.06	-
1211	768PUB	133,675,542 - 133,675,776	9	85.969	PZA00568-19	74	112	55	2	4.2	-
1212	768PUB	139,039,894 - 139,040,185	9	93.519	PHM13582-6	68	114	58	3	1.43	-
1213	ASTA	140187526	9	94.843	PZE-109093628	67	116	57	3	1.1	-
1214	ASTA	141588780	9	95.939	PZE-109094894	66	117	58	2	0.73	-
1215	ASTA	143065825	9	96.683	PZE-109097262	68	104	57	14	2.98	-
1216	ASTA	144163329	9	97.532	PZE-109098921	68	117	56	2	1.4	-
1217	IDT (SSR)	146816165	9	100.836	bnlg1525	64	109	55	14	1.15	-
1218	768PUB	146,717,052 - 146,717,307	9	103.278	PHM816-25	68	105	61	9	2.88	-
1219	768PUB	146717259	9	104.001	PHM816-29	77	97	61	8	9.33	***
1220	768PUB	147635857	9	106.634	PZA01715-1	64	112	63	4	0.95	-
1221	ASTA	147966808	9	107.705	PZE-109105485	66	113	64	0	1.22	-
1222	ASTA	148309120	9	107.911	PZE-109106186	64	113	63	3	0.82	-
1223	ASTA	149693494	9	109.587	PZE-109108057	64	108	68	3	2.53	-
1224	ASTA	150164468	9	111.048	PZE-109109248	64	108	65	6	1.87	-
1225	ASTA	150174621	9	111.255	PZE-109109275	64	111	67	1	1.73	-
1226	ASTA		9	111.886	PZE-109109768	65	107	65	6	2.23	-
1227	ASTA	150518204	9	112.302	PZE-109109629	64	113	64	2	0.93	-
1228	ASTA	151517027	9	113.14	PZE-109111133	63	115	64	1	0.6	-
1229	ASTA	151910837	9	115.255	PZE-109112659	66	112	61	4	1.15	-
1230	LGC		9	115.769	PZA00832_1	65	117	60	1	0.47	-
1231	IDT (SSR)	151644273	9	117.404	bnlg128	55	117	54	15	0.29	-
1232	ASTA	152237591	9	119.126	PZE-109113692	64	116	62	1	0.45	-
1233	ASTA	153186889	9	120.85	PZE-109116158	61	114	65	3	0.73	-
1234	ASTA	154008955	9	123.718	PZE-109118418	59	116	65	3	0.57	-
1235	LGC		9	126.597	PZA03573_1	61	116	64	2	0.41	-
1236	IDT (SSR)	154286611	9	127.507	bnlg1129	56	109	59	19	0.24	-
1237	IDT (SSR)	4,591,964	10	0	umc1318	72	122	48	1	4.78	*
1238	IDT (SSR)	2462036	10	2.825	umc1291	69	119	53	1	2.16	-
1239	ASTA	4697245	10	8.453	PZE-110005657	71	112	54	6	3.15	-
1240	ASTA	4881219	10	9.097	PZE-110006344	69	118	54	2	1.97	-
1241	ASTA	5879336	10	12.805	PZE-110007572	63	122	56	2	0.44	-
1242	ASTA	6076915	10	13.928	PZE-110008028	65	123	52	3	1.56	-
1243	ASTA	6458580	10	15.979	PZE-110008700	61	126	52	4	1.38	-
1244	LGC		10	16.809	PHM2828_83	59	127	54	3	1.02	-
1245	768PUB		10	16.809	PM01-000050T	62	127	53	1	1.26	-
1246	ASTA	6660268	10	17.017	PZE-110008930	63	124	53	3	1.1	-
1247	ASTA	12753074	10	26.041	PZE-110013774	58	137	46	2	5.71	*
1248	ASTA	12750630	10	26.258	PZE-110013759	57	132	47	7	4.17	-
1249	768PUB	38,542,419 - 38,542,419	10	30.73	PHM1812-32	65	130	46	2	4.49	-
1250	ASTA	73635357	10	31.152	PZE-110038474	65	132	45	1	5.31	*
1251	ASTA	76422787	10	31.981	PZE-110039576	63	134	44	2	6.02	**
1252	ASTA	77194927	10	32.395	PZE-110040021	65	132	44	2	5.85	*
1253	ASTA	78155856	10	33.304	PZE-110040928	63	134	45	1	5.47	*
1254	ASTA	80596675	10	33.984	PZE-110042215	63	135	44	1	6.22	**
1255	ASTA	84244146	10	34.32	PZE-110044324	64	133	44	2	5.91	*
1256	ASTA	83432930	10	34.673	PZE-110043675	62	131	45	5	4.85	*
1257	ASTA	82852911	10	35.086	PZE-110043433	64	133	44	2	5.91	*
1258	ASTA	86114928	10	35.708	PZE-110045597	66	132	45	0	5.44	*
1259	ASTA	92800765	10	36.121	PZE-110049371	60	134	45	4	5.4	*
1260	ASTA	91869062	10	36.121	PZE-110049023	64	134	45	0	5.54	*
1261	ASTA	108488760	10	36.534	PZE-110056428	66	132	45	0	5.44	*
1262	ASTA	107916267	10	36.74	PZE-110056000	67	131	45	0	5.47	*
1263	ASTA	96772181	10	36.946	PZE-110051403	66	132	45	0	5.44	*
1264	ASTA	107919202	10	37.24	PZE-110056035	67	129	45	2	5.22	*
1265	ASTA	94982817	10	37.653	PZE-110050295	66	114	45	18	3.96	-
1266	IDT (SSR)	114288173	10	40.593	umc1053	71	125	47	0	4.94	*
1267	ASTA	121127289	10	42.732	PZE-110065288	65	126	47	5	3.55	-
1268	ASTA	123705665	10	44.201	PZE-110067110	65	130	48	0	3.57	-
1269	By Design	125923329	10	46.109	s10_125923329	63	131	49	0	3.1	-
1270	768PUB	136320853	10	60.342	PZA01456-2	62	123	55	3	0.56	-
1271	ASTA	137771945	10	64.628	PZE-110086687	57	126	56	4	0.72	-
1272	ASTA	139692668	10	69.561	PZE-110091181	58	129	56	0	0.96	-
1273	ASTA	144620417	10	83.53	PZE-110101412	65	119	59	0	0.4	-
1274	ASTA	146746767	10	93.194	PZE-110106108	60	115	66	2	0.8	-
1275	ASTA	147433199	10	97.132	PZE-110108692	58	121	62	2	0.14	-
1276	768PUB	148,411,267 - 148,410,978	10	103.022	PHM1506.18	58	114	67	4	1.18	-
† significance levels: *: 0.1, **: 0.05, ***: 0.01, ****: 0.005, *****: 0.001, ******: 0.0005, *******: 0.0001
a, allele from Mp719 (resistant parent for aflatoxin resistance), h, alleles from both parents, b, allele from Mp705 (susceptible parent for aflatoxin resistance), - missing data
